# Supplementary material for: Complex modeling with detailed temporal predictors does not improve health records-based suicide risk prediction
Source: PubMed Central journal article supplement (PMC10036475; doi:10.1038/s41746-023-00772-4), 2023-03-23
Supplement: 41746_2023_772_MOESM1_ESM.pdf [file 41746_2023_772_MOESM1_ESM.pdf]

## Supplementary Information

Additional results to those included in the main text of the manuscript, *Complex modelling with detailed temporal predictors does not improve health records-based suicide risk prediction*. This supplementary material contains the following tables:

**Supplementary Table 1.** Cohort description of training and validation sample for mental health specialty visits and general medical visits used to estimate suicide death risk prediction model.

**Supplementary Table 2.** *In-sample* results for 5-fold cross-validation to select tuning parameters for random forest prediction models for suicide attempt (fatal and non-fatal) in the 90 days following the index visit.

**Supplementary Table 3.** *Out-of-sample* results for 5-fold cross-validation to select tuning parameters for random forest prediction models for suicide attempt (fatal and non-fatal) in the 90 days following the index visit.

**Supplementary Table 4.** *In-sample* results for 5-fold cross-validation to select tuning parameters for artificial neural network models for suicide attempt (fatal and non-fatal) in the 90 days following the index visit.

**Supplementary Table 5.** *Out-of-sample* results for 5-fold cross-validation to select tuning parameters for artificial neural network prediction models for suicide attempt (fatal and non-fatal) in the 90 days following the index visit.

**Supplementary Table 6.** *In-sample* results for 5-fold cross-validation to select tuning parameter for lasso variable selection for logistic regression prediction models for suicide attempt (fatal and non-fatal) in the 90 days following the index visit.

**Supplementary Table 7.** *Out-of-sample* results for 5-fold cross-validation to select tuning parameter for lasso variable selection for logistic regression prediction models for suicide attempt (fatal and non-fatal) in the 90 days following the index visit.

**Supplementary Table 8.** Prediction performance in validation data for **suicide attempt in the 90 days** following an outpatient mental health specialty visit across race and ethnicity.

**Supplementary Table 9.** Prediction performance in validation data for **suicide attempt in the 90 days** following an outpatient mental health specialty visit across sex.

**Supplementary Table 10** Prediction performance in validation data for **suicide attempt in the 90 days** following an outpatient general medical visit with a mental health diagnosis across race and ethnicity.

**Supplementary Table 11.** Prediction performance in validation data for **suicide attempt in the 90 days** following an outpatient general medical visit with a mental health diagnosis across sex.

## Supplementary Tables

**Supplementary Table 1. Cohort description of training and validation sample for mental health specialty visits and general medical visits used to estimate suicide death risk prediction model.** \*Individuals who reported identifying with more than one listed race and ethnicity contribute to all selected racial and ethnic subgroups. †At least one diagnosis in the last 60 months. ‡At least one prescription filled in the last 60 months.

| Characteristic                                                 | Mental health specialty visits |       |                 |       | General medical visits |       |                 |       |
|----------------------------------------------------------------|--------------------------------|-------|-----------------|-------|------------------------|-------|-----------------|-------|
|                                                                | Training<br>N                  | %     | Validation<br>N | %     | Training<br>N          | %     | Validation<br>N | %     |
| Visits                                                         | 9,779,178                      |       | 4,202,240       |       | 6,802,509              |       | 2,912,308       |       |
| People                                                         | 1,003,508                      |       | 430,076         |       | 1,729,402              |       | 741,174         |       |
| Visits with a suicide attempt in 90 day                        | 2,234                          | 0.023 | 965             | 0.023 | 1,103                  | 0.016 | 407             | 0.014 |
| Female                                                         | 6,217,808                      | 63.6  | 2,665,092       | 63.4  | 4,262,902              | 62.7  | 1,826,417       | 62.7  |
| Age group (year)                                               |                                |       |                 |       |                        |       |                 |       |
| 11-17                                                          | 1,076,873                      | 11.0  | 459,214         | 10.9  | 421,025                | 6.2   | 179,860         | 6.2   |
| 18-29                                                          | 1,628,136                      | 16.6  | 707,589         | 16.8  | 866,417                | 12.7  | 368,574         | 12.7  |
| 30-44                                                          | 2,487,861                      | 25.4  | 1,070,197       | 25.5  | 1,346,694              | 19.8  | 574,469         | 19.7  |
| 45-64                                                          | 3,469,620                      | 35.5  | 1,494,362       | 35.6  | 2,379,769              | 35.0  | 1,014,907       | 34.8  |
| 65 or older                                                    | 1,116,688                      | 11.4  | 470,878         | 11.2  | 1,788,604              | 26.3  | 774,498         | 26.6  |
| Race and ethnicity*                                            |                                |       |                 |       |                        |       |                 |       |
| Asian                                                          | 510,800                        | 5.2   | 218,648         | 5.2   | 345,502                | 5.1   | 146,063         | 5.0   |
| American Indian/Alaska Native                                  | 95,137                         | 1.0   | 42,796          | 1.0   | 83,545                 | 1.2   | 29,699          | 1.0   |
| Black/African American                                         | 860,986                        | 8.8   | 371,438         | 8.8   | 522,692                | 7.7   | 228,076         | 7.8   |
| Native Hawaiian/Pacific Islander                               | 103,648                        | 1.1   | 44,699          | 1.1   | 61,746                 | 0.9   | 27,402          | 0.9   |
| White, non-Hispanic                                            | 5,616,084                      | 57.4  | 2,410,285       | 57.4  | 4,122,681              | 60.6  | 1,766,381       | 60.7  |
| Hispanic ethnicity                                             | 2,326,135                      | 23.8  | 1,000,405       | 23.8  | 1,480,345              | 21.8  | 633,117         | 21.7  |
| Not recorded<br>(i.e., race and ethnicity unknown)             | 383,317                        | 3.9   | 165,287         | 3.9   | 236,469                | 3.5   | 103,962         | 3.6   |
| Insurance Type                                                 |                                |       |                 |       |                        |       |                 |       |
| Commercial group                                               | 7,201,285                      | 73.6  | 3,096,273       | 73.7  | 4,180,354              | 61.5  | 1,782,557       | 61.2  |
| High-deductible                                                | 797,238                        | 8.2   | 347,339         | 8.3   | 446,598                | 6.6   | 191,148         | 6.6   |
| Individual coverage                                            | 1,714,131                      | 17.5  | 731,722         | 17.4  | 1,498,960              | 22.0  | 648,710         | 22.3  |
| Medicaid                                                       | 609,117                        | 6.2   | 257,590         | 6.1   | 586,405                | 8.6   | 250,829         | 8.6   |
| Medicare                                                       | 1,558,470                      | 15.9  | 659,764         | 15.7  | 1,983,624              | 29.2  | 864,062         | 29.7  |
| PHQ item 9 recorded at index visit                             | 1,299,662                      | 13.3  | 555,419         | 13.2  | 536,331                | 7.9   | 231,970         | 8.0   |
| Response: 0                                                    | 982,452                        | 10.0  | 420,254         | 10.0  | 427,425                | 6.3   | 184,812         | 6.3   |
| Response: 1                                                    | 202,508                        | 2.1   | 86,956          | 2.1   | 70,383                 | 1.0   | 30,231          | 1.0   |
| Response: 2                                                    | 67,343                         | 0.7   | 28,355          | 0.7   | 23,616                 | 0.3   | 10,296          | 0.4   |
| Response: 3                                                    | 47,359                         | 0.5   | 19,854          | 0.5   | 14,907                 | 0.2   | 6,631           | 0.2   |
| PHQ first 8 items recorded at index vi                         | 1,195,733                      | 12.2  | 511,756         | 12.2  | 538,520                | 7.9   | 232,870         | 8.0   |
| Response: 0-4                                                  | 284,764                        | 2.9   | 122,206         | 2.9   | 118,339                | 1.7   | 50,950          | 1.7   |
| Response: 5-10                                                 | 390,844                        | 4.0   | 168,068         | 4.0   | 161,617                | 2.4   | 69,801          | 2.4   |
| Response: 11-15                                                | 252,604                        | 2.6   | 108,103         | 2.6   | 126,846                | 1.9   | 55,044          | 1.9   |
| Response: 16-20                                                | 177,233                        | 1.8   | 75,090          | 1.8   | 93,168                 | 1.4   | 40,193          | 1.4   |
| Response: 21 or higher                                         | 90,288                         | 0.9   | 38,289          | 0.9   | 38,550                 | 0.6   | 16,882          | 0.6   |
| Anxiety <sup>†</sup>                                           | 6,850,780                      | 70.1  | 2,947,219       | 70.1  | 3,567,884              | 52.4  | 1,528,500       | 52.5  |
| Bipolar <sup>†</sup>                                           | 1,285,117                      | 13.1  | 551,636         | 13.1  | 370,631                | 5.4   | 157,865         | 5.4   |
| Depression <sup>†</sup>                                        | 7,119,353                      | 72.8  | 3,066,991       | 73.0  | 3,850,891              | 56.6  | 1,653,667       | 56.8  |
| Personality disorder <sup>†</sup>                              | 1,816,326                      | 18.6  | 784,076         | 18.7  | 760,352                | 11.2  | 331,131         | 11.4  |
| Schizophrenia or other psychosis<br>disorder <sup>†</sup>      | 762,490                        | 7.8   | 331,419         | 7.9   | 335,122                | 4.9   | 146,553         | 5.0   |
| Traumatic brain injury <sup>†</sup>                            | 333,691                        | 3.4   | 141,919         | 3.4   | 245,892                | 3.6   | 103,848         | 3.6   |
| Prior mental health inpatient stay <sup>‡</sup>                | 2,299,675                      | 23.5  | 1,000,891       | 23.8  | 1,457,470              | 21.4  | 633,870         | 21.8  |
| Prior mental health emergency<br>department visit <sup>‡</sup> | 3,307,818                      | 33.8  | 1,421,958       | 33.8  | 2,078,899              | 30.6  | 890,070         | 30.6  |
| Prior mental health outpatient visit <sup>‡</sup>              | 8,942,442                      | 91.4  | 3,843,978       | 91.5  | 3,129,418              | 46.0  | 1,341,378       | 46.1  |
| Prior antidepressant fill <sup>‡</sup>                         | 6,646,570                      | 68.0  | 2,858,173       | 68.0  | 4,125,466              | 60.6  | 1,770,887       | 60.8  |
| Prior benzodiazepine fill <sup>‡</sup>                         | 4,510,514                      | 46.1  | 1,948,438       | 46.4  | 2,813,755              | 41.4  | 1,201,423       | 41.3  |
| Prior first generation antipsychotic fill                      | 649,512                        | 6.6   | 284,828         | 6.8   | 399,541                | 5.9   | 173,118         | 5.9   |
| Prior lithium fill <sup>‡</sup>                                | 405,227                        | 4.1   | 177,942         | 4.2   | 89,229                 | 1.3   | 40,747          | 1.4   |
| Prior second generation antipsychotic                          | 2,071,653                      | 21.2  | 898,982         | 21.4  | 649,250                | 9.5   | 282,962         | 9.7   |

**Supplementary Table 2.** *In-sample* results averaged over 5-fold cross-validation to select tuning parameters for random forest prediction models for suicide attempt (fatal and non-fatal) in the 90 days following the index visit. AUC = area under the receiver operating curve; PPV = positive predictive value \*Unusually longer timing for this setting was due to using a less optimized AWS instance than was used for all other runs.

| Tuning parameter values                            |                 | Performance metrics |                                          |                                  |                                      |                                             |
|----------------------------------------------------|-----------------|---------------------|------------------------------------------|----------------------------------|--------------------------------------|---------------------------------------------|
| Minimum splitable node size                        | Number of trees | AUC                 | Sensitivity, 99 <sup>th</sup> percentile | PPV, 99 <sup>th</sup> percentile | F-score, 99 <sup>th</sup> percentile | Total run time (hours) for cross-validation |
| Mental health specialty visits                     |                 |                     |                                          |                                  |                                      |                                             |
| 1,000                                              | 10              | 0.980               | 0.608                                    | 0.387                            | 0.473                                | 6.015                                       |
| 10,000                                             | 10              | 0.939               | 0.347                                    | 0.221                            | 0.270                                | 5.929                                       |
| 25,000                                             | 10              | 0.916               | 0.278                                    | 0.177                            | 0.216                                | 6.277                                       |
| 50,000                                             | 10              | 0.898               | 0.238                                    | 0.151                            | 0.185                                | 6.181                                       |
| 100,000                                            | 10              | 0.879               | 0.214                                    | 0.135                            | 0.166                                | 5.547                                       |
| 1,000                                              | 100             | 0.988               | 0.668                                    | 0.425                            | 0.520                                | 11.242                                      |
| 10,000                                             | 100             | 0.949               | 0.366                                    | 0.233                            | 0.284                                | 10.942                                      |
| 25,000                                             | 100             | 0.926               | 0.285                                    | 0.181                            | 0.221                                | 10.575                                      |
| 50,000                                             | 100             | 0.906               | 0.245                                    | 0.156                            | 0.190                                | 10.132                                      |
| 100,000                                            | 100             | 0.886               | 0.221                                    | 0.141                            | 0.172                                | 14.751*                                     |
| 1,000                                              | 500             | NA                  | NA                                       | NA                               | NA                                   | NA                                          |
| 10,000                                             | 500             | 0.951               | 0.368                                    | 0.234                            | 0.286                                | 36.835                                      |
| 25,000                                             | 500             | 0.928               | 0.285                                    | 0.181                            | 0.222                                | 35.035                                      |
| 50,000                                             | 500             | 0.908               | 0.245                                    | 0.156                            | 0.191                                | 33.191                                      |
| 100,000                                            | 500             | NA                  | NA                                       | NA                               | NA                                   | NA                                          |
| Mental health visits to a general medical provider |                 |                     |                                          |                                  |                                      |                                             |
| 1,000                                              | 10              | NA                  | NA                                       | NA                               | NA                                   | NA                                          |
| 10,000                                             | 10              | 0.930               | 0.366                                    | 0.120                            | 0.180                                | 3.722                                       |
| 25,000                                             | 10              | 0.906               | 0.298                                    | 0.097                            | 0.147                                | 3.668                                       |
| 50,000                                             | 10              | 0.887               | 0.263                                    | 0.086                            | 0.129                                | 3.543                                       |
| 100,000                                            | 10              | 0.869               | 0.237                                    | 0.077                            | 0.116                                | 3.433                                       |
| 1,000                                              | 100             | NA                  | NA                                       | NA                               | NA                                   | NA                                          |
| 10,000                                             | 100             | 0.942               | 0.396                                    | 0.130                            | 0.195                                | 8.136                                       |
| 25,000                                             | 100             | 0.917               | 0.321                                    | 0.105                            | 0.158                                | 7.919                                       |
| 50,000                                             | 100             | 0.897               | 0.273                                    | 0.089                            | 0.134                                | 7.602                                       |
| 100,000                                            | 100             | 0.878               | 0.239                                    | 0.078                            | 0.118                                | 7.208                                       |

**Supplementary Table 3.** *Out-of-sample* results for 5-fold cross-validation to select tuning parameters for random forest prediction models for suicide attempt (fatal and non-fatal) in the 90 days following the index visit. The bolded row is the optimal tuning parameters selected. AUC = area under the receiver operating curve; PPV = positive predictive value.

| Tuning parameter values                            |                    |              | Performance metrics                         |                                     |                                         |
|----------------------------------------------------|--------------------|--------------|---------------------------------------------|-------------------------------------|-----------------------------------------|
| Minimum<br>splittable node size                    | Number of<br>trees | AUC          | Sensitivity,<br>99 <sup>th</sup> percentile | PPV,<br>99 <sup>th</sup> percentile | F-score,<br>99 <sup>th</sup> percentile |
| Mental health specialty visits                     |                    |              |                                             |                                     |                                         |
| 1,000                                              | 10                 | 0.806        | 0.153                                       | 0.098                               | 0.119                                   |
| 10,000                                             | 10                 | 0.835        | 0.169                                       | 0.108                               | 0.132                                   |
| 25,000                                             | 10                 | 0.842        | 0.177                                       | 0.113                               | 0.138                                   |
| 50,000                                             | 10                 | 0.842        | 0.180                                       | 0.115                               | 0.140                                   |
| 100,000                                            | 10                 | 0.841        | 0.182                                       | 0.115                               | 0.141                                   |
| 1,000                                              | 100                | 0.836        | 0.177                                       | 0.112                               | 0.137                                   |
| 10,000                                             | 100                | 0.847        | 0.187                                       | 0.119                               | 0.145                                   |
| <b>25,000</b>                                      | <b>100</b>         | <b>0.849</b> | <b>0.188</b>                                | <b>0.120</b>                        | <b>0.146</b>                            |
| 50,000                                             | 100                | 0.848        | 0.190                                       | 0.121                               | 0.147                                   |
| 100,000                                            | 100                | 0.845        | 0.189                                       | 0.120                               | 0.147                                   |
| 1,000                                              | 500                | NA           | NA                                          | NA                                  | NA                                      |
| 10,000                                             | 500                | 0.848        | 0.188                                       | 0.120                               | 0.147                                   |
| 25,000                                             | 500                | 0.849        | 0.189                                       | 0.120                               | 0.147                                   |
| 50,000                                             | 500                | 0.848        | 0.190                                       | 0.121                               | 0.148                                   |
| 100,000                                            | 500                | NA           | NA                                          | NA                                  | NA                                      |
| Mental health visits to a general medical provider |                    |              |                                             |                                     |                                         |
| 1,000                                              | 10                 | NA           | NA                                          | NA                                  | NA                                      |
| 10,000                                             | 10                 | 0.824        | 0.214                                       | 0.070                               | 0.106                                   |
| 25,000                                             | 10                 | 0.828        | 0.213                                       | 0.070                               | 0.105                                   |
| 50,000                                             | 10                 | 0.829        | 0.213                                       | 0.070                               | 0.105                                   |
| 100,000                                            | 10                 | 0.828        | 0.212                                       | 0.069                               | 0.105                                   |
| 1,000                                              | 100                | NA           | NA                                          | NA                                  | NA                                      |
| 10,000                                             | 100                | 0.835        | 0.221                                       | 0.072                               | 0.109                                   |
| <b>25,000</b>                                      | <b>100</b>         | <b>0.836</b> | <b>0.219</b>                                | <b>0.072</b>                        | <b>0.108</b>                            |
| 50,000                                             | 100                | 0.836        | 0.219                                       | 0.072                               | 0.108                                   |
| 100,000                                            | 100                | 0.833        | 0.214                                       | 0.070                               | 0.105                                   |

**Supplementary Table 4.** *In-sample* results averaged over 5-fold cross-validation to select tuning parameters for artificial neural network models for suicide attempt (fatal and non-fatal) in the 90 days following the index visit. AUC = area under the receiver operating curve; PPV = positive predictive value. \*Shorter run times reflect the use of Microsoft Windows Server 2016 on p2.8xlarge (32 vCPUs, 488 GiB memory) instead of the standard g3.16xlarge (64 vCPUs, 488 GiB memory) used in all other cases.

| Tuning parameter values                            |                                  | AUC   | Sensitivity,<br>99 <sup>th</sup> percentile | Performance metrics                 |                                         |                                             |
|----------------------------------------------------|----------------------------------|-------|---------------------------------------------|-------------------------------------|-----------------------------------------|---------------------------------------------|
| Number of hidden layers                            | Number of nodes per hidden layer |       |                                             | PPV,<br>99 <sup>th</sup> percentile | F-score,<br>99 <sup>th</sup> percentile | Total run time (hours) for cross-validation |
| Mental health specialty visits                     |                                  |       |                                             |                                     |                                         |                                             |
| 1                                                  | 4                                | 0.865 | 0.2195                                      | 0.1396                              | 0.171                                   | 15.167                                      |
| 1                                                  | 8                                | 0.869 | 0.2318                                      | 0.1475                              | 0.180                                   | 15.500                                      |
| 2                                                  | 4                                | 0.865 | 0.2184                                      | 0.1390                              | 0.170                                   | 18.250                                      |
| 2                                                  | 8                                | 0.872 | 0.2453                                      | 0.1560                              | 0.191                                   | 14.500                                      |
| 2                                                  | 16                               | 0.878 | 0.2772                                      | 0.1763                              | 0.216                                   | 15.000                                      |
| Mental health visits to a general medical provider |                                  |       |                                             |                                     |                                         |                                             |
| 1                                                  | 4                                | 0.849 | 0.2647                                      | 0.0870                              | 0.131                                   | 8.205*                                      |
| 1                                                  | 8                                | 0.855 | 0.2845                                      | 0.0934                              | 0.141                                   | 8.991*                                      |
| 2                                                  | 4                                | 0.850 | 0.2557                                      | 0.0840                              | 0.126                                   | 8.171*                                      |
| 2                                                  | 8                                | 0.856 | 0.2888                                      | 0.0949                              | 0.143                                   | 8.886*                                      |

**Supplementary Table 5.** *Out-of-sample* results for 5-fold cross-validation to select tuning parameters for artificial neural network prediction models for suicide attempt (fatal and non-fatal) in the 90 days following the index visit. The bolded row is the optimal tuning parameters selected. AUC = area under the receiver operating curve; PPV = positive predictive value.

| Tuning parameter values                            |                            | AUC          | Sensitivity,<br>99 <sup>th</sup> percentile | Performance metrics                 |                                         |
|----------------------------------------------------|----------------------------|--------------|---------------------------------------------|-------------------------------------|-----------------------------------------|
| Number of hidden layers                            | Number of nodes per hidden |              |                                             | PPV,<br>99 <sup>th</sup> percentile | F-score,<br>99 <sup>th</sup> percentile |
| Mental health specialty visits                     |                            |              |                                             |                                     |                                         |
| <b>1</b>                                           | <b>4</b>                   | <b>0.851</b> | <b>0.187</b>                                | <b>0.119</b>                        | <b>0.146</b>                            |
| 1                                                  | 8                          | 0.844        | 0.180                                       | 0.115                               | 0.140                                   |
| 2                                                  | 4                          | 0.847        | 0.188                                       | 0.119                               | 0.146                                   |
| 2                                                  | 8                          | 0.842        | 0.180                                       | 0.115                               | 0.140                                   |
| 2                                                  | 16                         | 0.836        | 0.171                                       | 0.109                               | 0.133                                   |
| Mental health visits to a general medical provider |                            |              |                                             |                                     |                                         |
| 1                                                  | 4                          | 0.831        | 0.224                                       | 0.074                               | 0.111                                   |
| 1                                                  | 8                          | 0.814        | 0.209                                       | 0.069                               | 0.103                                   |
| <b>2</b>                                           | <b>4</b>                   | <b>0.835</b> | <b>0.224</b>                                | <b>0.074</b>                        | <b>0.111</b>                            |
| 2                                                  | 8                          | 0.816        | 0.217                                       | 0.071                               | 0.107                                   |

**Supplementary Table 6. *In-sample* results averaged over 5-fold cross-validation to select tuning parameter for lasso variable selection for logistic regression prediction models for suicide attempt (fatal and non-fatal) in the 90 days following the index visit.**

AUC = Area under the receiver operating curve; PPV = positive predictive value. \*Microsoft Windows Server 2016 on p2.8xlarge (32 vCPUs, 488 GiB memory) used to conduct lasso for the logistic regression, instead of on g3.16xlarge (64 vCPUs, 488 GiB memory).

| Tuning parameter value                                    | AUC   | Sensitivity,<br>99 <sup>th</sup> percentile | PPV,<br>99 <sup>th</sup> percentile | F-score,<br>99 <sup>th</sup> percentile | Total run time (hours) |
|-----------------------------------------------------------|-------|---------------------------------------------|-------------------------------------|-----------------------------------------|------------------------|
| <b>Mental health specialty visits</b>                     |       |                                             |                                     |                                         |                        |
| $\lambda_1=3.68e-07^*$                                    | 0.864 | 0.228                                       | 0.146                               | 0.178                                   | 10.483                 |
| $\lambda_2=5.83e-07^*$                                    | 0.864 | 0.227                                       | 0.145                               | 0.177                                   | 10.233                 |
| $\lambda_3=9.24e-07^*$                                    | 0.864 | 0.225                                       | 0.144                               | 0.176                                   | 10.267                 |
| $\lambda_4=3.68e-06$                                      | 0.862 | 0.211                                       | 0.135                               | 0.165                                   | 15.167                 |
| $\lambda_5=5.83e-06$                                      | 0.860 | 0.206                                       | 0.131                               | 0.160                                   | 16.767                 |
| $\lambda_6=9.24e-06$                                      | 0.859 | 0.202                                       | 0.129                               | 0.157                                   | 15.967                 |
| $\lambda_7=1.46e-05$                                      | 0.857 | 0.197                                       | 0.126                               | 0.153                                   | 15.583                 |
| $\lambda_8=2.32e-05$                                      | 0.856 | 0.193                                       | 0.124                               | 0.151                                   | 15.717                 |
| $\lambda_9=3.68e-05$                                      | 0.854 | 0.189                                       | 0.121                               | 0.148                                   | 14.567                 |
| $\lambda_{10}=5.83e-05$                                   | 0.852 | 0.185                                       | 0.118                               | 0.144                                   | 17.083                 |
| $\lambda_{11}=9.24e-05$                                   | 0.849 | 0.181                                       | 0.115                               | 0.141                                   | 18.467                 |
| $\lambda_{12}=1.46e-04$                                   | 0.846 | 0.173                                       | 0.111                               | 0.135                                   | 17.733                 |
| $\lambda_{13}=2.32e-04$                                   | 0.841 | 0.166                                       | 0.106                               | 0.129                                   | 17.200                 |
| $\lambda_{14}=3.68e-04$                                   | 0.830 | 0.156                                       | 0.099                               | 0.121                                   | 17.300                 |
| $\lambda_{25}=9.24e-04$                                   | 0.774 | 0.151                                       | 0.071                               | 0.096                                   | 16.083                 |
| <b>Mental health visits to a general medical provider</b> |       |                                             |                                     |                                         |                        |
| $\lambda_1=3.68e-07$                                      | 0.852 | 0.271                                       | 0.089                               | 0.133                                   | 12.800                 |
| $\lambda_2=5.83e-07$                                      | 0.852 | 0.270                                       | 0.088                               | 0.133                                   | 13.133                 |
| $\lambda_3=9.24e-07$                                      | 0.852 | 0.267                                       | 0.087                               | 0.132                                   | 11.917                 |
| $\lambda_4=3.68e-06$                                      | 0.848 | 0.255                                       | 0.083                               | 0.126                                   | 11.350                 |
| $\lambda_5=5.83e-06$                                      | 0.846 | 0.250                                       | 0.082                               | 0.124                                   | 11.867                 |
| $\lambda_6=9.24e-06$                                      | 0.843 | 0.242                                       | 0.079                               | 0.120                                   | 11.617                 |
| $\lambda_7=1.46e-05$                                      | 0.841 | 0.235                                       | 0.077                               | 0.116                                   | 11.783                 |
| $\lambda_8=2.32e-05$                                      | 0.838 | 0.231                                       | 0.076                               | 0.114                                   | 11.767                 |
| $\lambda_9=3.68e-05$                                      | 0.835 | 0.226                                       | 0.074                               | 0.111                                   | 11.950                 |
| $\lambda_{10}=5.83e-05$                                   | 0.832 | 0.217                                       | 0.071                               | 0.107                                   | 12.117                 |
| $\lambda_{11}=9.24e-05$                                   | 0.828 | 0.209                                       | 0.069                               | 0.103                                   | 11.767                 |
| $\lambda_{12}=1.46e-04$                                   | 0.822 | 0.200                                       | 0.066                               | 0.099                                   | 11.800                 |
| $\lambda_{13}=2.32e-04$                                   | 0.808 | 0.190                                       | 0.062                               | 0.094                                   | 11.567                 |
| $\lambda_{14}=3.68e-04$                                   | 0.784 | 0.180                                       | 0.059                               | 0.089                                   | 11.733                 |
| $\lambda_{15}=9.24e-04$                                   | 0.725 | 0.303                                       | 0.019                               | 0.035                                   | 11.883                 |

**Supplementary Table 7. Out-of-sample results for 5-fold cross-validation to select tuning parameter for lasso variable selection for logistic regression prediction models for suicide attempt (fatal and non-fatal) in the 90 days following the index visit.** The bolded row is performance of the cross-validation out of sample performance for the tuning parameters selected as optimal. AUC = area under the receiver operating curve; PPV = positive predictive value

| Tuning parameter value                                    | AUC          | Sensitivity,<br>99 <sup>th</sup> percentile | PPV,<br>99 <sup>th</sup> percentile | F-score,<br>99 <sup>th</sup> percentile |
|-----------------------------------------------------------|--------------|---------------------------------------------|-------------------------------------|-----------------------------------------|
| <b>Mental health specialty visits</b>                     |              |                                             |                                     |                                         |
| $\lambda_1 = 3.68e-07$                                    | 0.850        | 0.187                                       | 0.120                               | 0.146                                   |
| $\lambda_2 = 5.83e-07$                                    | 0.850        | 0.187                                       | 0.120                               | 0.146                                   |
| $\lambda_3 = 9.24e-07$                                    | 0.851        | 0.188                                       | 0.120                               | 0.146                                   |
| $\lambda_4 = 3.68e-06$                                    | 0.852        | 0.187                                       | 0.120                               | 0.146                                   |
| $\lambda_5 = 5.83e-06$                                    | 0.852        | 0.188                                       | 0.120                               | 0.147                                   |
| $\lambda_6 = 9.24e-06$                                    | 0.853        | 0.187                                       | 0.120                               | 0.146                                   |
| <b><math>\lambda_7 = 1.46e-05</math></b>                  | <b>0.853</b> | <b>0.187</b>                                | <b>0.119</b>                        | <b>0.146</b>                            |
| $\lambda_8 = 2.32e-05$                                    | 0.852        | 0.186                                       | 0.119                               | 0.145                                   |
| $\lambda_9 = 3.68e-05$                                    | 0.851        | 0.182                                       | 0.116                               | 0.142                                   |
| $\lambda_{10} = 5.83e-05$                                 | 0.850        | 0.18                                        | 0.115                               | 0.140                                   |
| $\lambda_{11} = 9.24e-05$                                 | 0.847        | 0.177                                       | 0.113                               | 0.138                                   |
| $\lambda_{12} = 1.46e-04$                                 | 0.845        | 0.17                                        | 0.109                               | 0.133                                   |
| $\lambda_{13} = 2.32e-04$                                 | 0.840        | 0.164                                       | 0.105                               | 0.128                                   |
| $\lambda_{14} = 3.68e-04$                                 | 0.829        | 0.153                                       | 0.098                               | 0.120                                   |
| $\lambda_{25} = 9.24e-04$                                 | 0.772        | 0.118                                       | 0.070                               | 0.088                                   |
| <b>Mental health visits to a general medical provider</b> |              |                                             |                                     |                                         |
| $\lambda_1 = 3.68e-07$                                    | 0.832        | 0.223                                       | 0.073                               | 0.110                                   |
| $\lambda_2 = 5.83e-07$                                    | 0.833        | 0.225                                       | 0.074                               | 0.111                                   |
| $\lambda_3 = 9.24e-07$                                    | 0.835        | 0.227                                       | 0.074                               | 0.112                                   |
| $\lambda_4 = 3.68e-06$                                    | 0.836        | 0.229                                       | 0.075                               | 0.113                                   |
| $\lambda_5 = 5.83e-06$                                    | 0.836        | 0.228                                       | 0.075                               | 0.112                                   |
| <b><math>\lambda_6 = 9.24e-06</math></b>                  | <b>0.837</b> | <b>0.226</b>                                | <b>0.074</b>                        | <b>0.111</b>                            |
| $\lambda_7 = 1.46e-05$                                    | 0.836        | 0.224                                       | 0.073                               | 0.111                                   |
| $\lambda_8 = 2.32e-05$                                    | 0.835        | 0.224                                       | 0.073                               | 0.110                                   |
| $\lambda_9 = 3.68e-05$                                    | 0.832        | 0.221                                       | 0.072                               | 0.109                                   |
| $\lambda_{10} = 5.83e-05$                                 | 0.830        | 0.213                                       | 0.070                               | 0.105                                   |
| $\lambda_{11} = 9.24e-05$                                 | 0.826        | 0.206                                       | 0.067                               | 0.101                                   |
| $\lambda_{12} = 1.46e-04$                                 | 0.821        | 0.195                                       | 0.064                               | 0.096                                   |
| $\lambda_{13} = 2.32e-04$                                 | 0.807        | 0.188                                       | 0.062                               | 0.093                                   |
| $\lambda_{14} = 3.68e-04$                                 | 0.783        | 0.180                                       | 0.059                               | 0.089                                   |
| $\lambda_{15} = 9.24e-04$                                 | 0.720        | 0.048                                       | 0.015                               | 0.023                                   |

**Supplementary Table 8.** Prediction performance in validation data for **suicide attempt in the 90 days** following an outpatient mental health specialty visit across race and ethnicity; 95% confidence intervals constructed using 10,000 bootstrap samples. AUC = area under the receiver operating curve; PPV = positive predictive value; LR=logistic regression (after lasso variable selection); RF=random forests; ANN=artificial neural network.

| Prediction Model                                                                                                     | AUC (95% CI)            | Brier score (95% CI)                                | F-score, 99 <sup>th</sup> percentile (95% CI) | Sensitivity, 99 <sup>th</sup> percentile (95% CI) | Specificity, 99 <sup>th</sup> percentile (95% CI) | PPV, 99 <sup>th</sup> percentile (95% CI) |
|----------------------------------------------------------------------------------------------------------------------|-------------------------|-----------------------------------------------------|-----------------------------------------------|---------------------------------------------------|---------------------------------------------------|-------------------------------------------|
| America Indian / Alaskan Native (N visits (events) training: 105,359 (851); N visits (events) testing: 43,814 (350)) |                         |                                                     |                                               |                                                   |                                                   |                                           |
| OP                                                                                                                   | 0.835<br>(0.813, 0.855) | 7.8x10 <sup>-3</sup><br>(7.0,8.6) x10 <sup>-3</sup> | 0.143<br>(0.114, 0.173)                       | 0.203<br>(0.161, 0.245)                           | 0.987<br>(0.986, 0.988)                           | 0.111<br>(0.087, 0.136)                   |
| LR                                                                                                                   | 0.834<br>(0.811, 0.856) | 7.8x10 <sup>-3</sup><br>(7.0,8.5) x10 <sup>-3</sup> | 0.161<br>(0.129, 0.193)                       | 0.211<br>(0.169, 0.254)                           | 0.989<br>(0.988, 0.990)                           | 0.131<br>(0.103, 0.159)                   |
| RF                                                                                                                   | 0.823<br>(0.800, 0.846) | 7.6x10 <sup>-3</sup><br>(6.9,8.4) x10 <sup>-3</sup> | 0.130<br>(0.101, 0.159)                       | 0.183<br>(0.142, 0.224)                           | 0.987<br>(0.986, 0.988)                           | 0.100<br>(0.078, 0.125)                   |
| ANN                                                                                                                  | 0.844<br>(0.823, 0.864) | 7.5x10 <sup>-3</sup><br>(6.8,8.3) x10 <sup>-3</sup> | 0.156<br>(0.123, 0.189)                       | 0.194<br>(0.153, 0.237)                           | 0.990<br>(0.989, 0.991)                           | 0.130<br>(0.102, 0.160)                   |
| Ensemble:                                                                                                            | 0.834<br>(0.811, 0.856) | 7.5x10 <sup>-3</sup><br>(6.8,8.3) x10 <sup>-3</sup> | 0.171<br>(0.138, 0.204)                       | 0.226<br>(0.182, 0.270)                           | 0.989<br>(0.988, 0.990)                           | 0.138<br>(0.110, 0.167)                   |
| LR/RF                                                                                                                | 0.836<br>(0.814, 0.858) | 7.6x10 <sup>-3</sup><br>(6.8,8.3) x10 <sup>-3</sup> | 0.150<br>(0.119, 0.181)                       | 0.206<br>(0.163, 0.249)                           | 0.988<br>(0.987, 0.989)                           | 0.118<br>(0.093, 0.145)                   |
| Ensemble:                                                                                                            | 0.842<br>(0.820, 0.863) | 7.6x10 <sup>-3</sup><br>(6.8,8.4) x10 <sup>-3</sup> | 0.172<br>(0.138, 0.205)                       | 0.223<br>(0.179, 0.267)                           | 0.989<br>(0.988, 0.990)                           | 0.140<br>(0.111, 0.169)                   |
| LR/ANN                                                                                                               | 0.839<br>(0.816, 0.860) | 7.5x10 <sup>-3</sup><br>(6.8,8.3) x10 <sup>-3</sup> | 0.169<br>(0.136, 0.202)                       | 0.223<br>(0.179, 0.267)                           | 0.989<br>(0.988, 0.990)                           | 0.136<br>(0.109, 0.165)                   |
| LR/RF/ANN                                                                                                            |                         |                                                     |                                               |                                                   |                                                   |                                           |
| Asian (N visits (events) training: 575,790 (3,343); N visits (events) testing: 241,079 (1,356))                      |                         |                                                     |                                               |                                                   |                                                   |                                           |
| OP                                                                                                                   | 0.861<br>(0.850, 0.871) | 5.5x10 <sup>-3</sup><br>(5.2,5.7) x10 <sup>-3</sup> | 0.131<br>(0.115, 0.146)                       | 0.159<br>(0.140, 0.179)                           | 0.993<br>(0.992, 0.993)                           | 0.111<br>(0.097, 0.125)                   |
| LR                                                                                                                   | 0.859<br>(0.848, 0.869) | 5.5x10 <sup>-3</sup><br>(5.2,5.8) x10 <sup>-3</sup> | 0.133<br>(0.118, 0.149)                       | 0.173<br>(0.153, 0.193)                           | 0.992<br>(0.992, 0.992)                           | 0.108<br>(0.096, 0.122)                   |
| RF                                                                                                                   | 0.845<br>(0.834, 0.856) | 5.5x10 <sup>-3</sup><br>(5.2,5.8) x10 <sup>-3</sup> | 0.103<br>(0.089, 0.117)                       | 0.131<br>(0.113, 0.149)                           | 0.992<br>(0.992, 0.992)                           | 0.085<br>(0.073, 0.097)                   |
| ANN                                                                                                                  | 0.858<br>(0.848, 0.868) | 5.5x10 <sup>-3</sup><br>(5.2,5.7) x10 <sup>-3</sup> | 0.126<br>(0.110, 0.141)                       | 0.149<br>(0.130, 0.168)                           | 0.993<br>(0.993, 0.993)                           | 0.108<br>(0.094, 0.123)                   |
| Ensemble:                                                                                                            | 0.859<br>(0.848, 0.869) | 5.5x10 <sup>-3</sup><br>(5.2,5.7) x10 <sup>-3</sup> | 0.125<br>(0.111, 0.140)                       | 0.162<br>(0.142, 0.181)                           | 0.992<br>(0.992, 0.992)                           | 0.103<br>(0.090, 0.115)                   |
| LR/RF                                                                                                                | 0.857<br>(0.847, 0.867) | 5.5x10 <sup>-3</sup><br>(5.2,5.7) x10 <sup>-3</sup> | 0.121<br>(0.106, 0.137)                       | 0.151<br>(0.132, 0.171)                           | 0.992<br>(0.992, 0.993)                           | 0.102<br>(0.088, 0.115)                   |
| Ensemble:                                                                                                            | 0.860<br>(0.850, 0.870) | 5.5x10 <sup>-3</sup><br>(5.2,5.7) x10 <sup>-3</sup> | 0.136<br>(0.121, 0.152)                       | 0.173<br>(0.153, 0.194)                           | 0.992<br>(0.992, 0.993)                           | 0.112<br>(0.099, 0.126)                   |
| LR/ANN                                                                                                               | 0.861<br>(0.850, 0.871) | 5.5x10 <sup>-3</sup><br>(5.2,5.7) x10 <sup>-3</sup> | 0.127<br>(0.112, 0.142)                       | 0.162<br>(0.143, 0.182)                           | 0.992<br>(0.992, 0.993)                           | 0.105<br>(0.092, 0.118)                   |
| Ensemble:                                                                                                            |                         |                                                     |                                               |                                                   |                                                   |                                           |
| LR/RF/ANN                                                                                                            |                         |                                                     |                                               |                                                   |                                                   |                                           |
| Black / African American:(N visits (events) training: 937,826 (4,327); N visits (events) testing: 400,089 (2,067))   |                         |                                                     |                                               |                                                   |                                                   |                                           |
| OP                                                                                                                   | 0.837<br>(0.828, 0.845) | 5.1x10 <sup>-3</sup><br>(4.9,5.3) x10 <sup>-3</sup> | 0.095<br>(0.083, 0.107)                       | 0.097<br>(0.084, 0.110)                           | 0.995<br>(0.995, 0.995)                           | 0.092<br>(0.080, 0.105)                   |
| LR                                                                                                                   | 0.831<br>(0.822, 0.839) | 5.0x10 <sup>-3</sup><br>(4.8,5.3) x10 <sup>-3</sup> | 0.100<br>(0.088, 0.112)                       | 0.110<br>(0.097, 0.124)                           | 0.994<br>(0.994, 0.995)                           | 0.092<br>(0.080, 0.103)                   |
| RF                                                                                                                   | 0.824<br>(0.815, 0.833) | 5.0x10 <sup>-3</sup><br>(4.8,5.2) x10 <sup>-3</sup> | 0.104<br>(0.092, 0.116)                       | 0.122<br>(0.108, 0.136)                           | 0.994<br>(0.993, 0.994)                           | 0.091<br>(0.081, 0.102)                   |
| ANN                                                                                                                  | 0.837<br>(0.828, 0.845) | 5.0x10 <sup>-3</sup><br>(4.8,5.2) x10 <sup>-3</sup> | 0.116<br>(0.103, 0.129)                       | 0.121<br>(0.107, 0.135)                           | 0.995<br>(0.995, 0.995)                           | 0.112<br>(0.099, 0.125)                   |
| Ensemble:                                                                                                            | 0.836<br>(0.827, 0.844) | 5.0x10 <sup>-3</sup><br>(4.8,5.2) x10 <sup>-3</sup> | 0.110<br>(0.097, 0.122)                       | 0.121<br>(0.107, 0.136)                           | 0.994<br>(0.994, 0.995)                           | 0.100<br>(0.089, 0.112)                   |
| LR/RF                                                                                                                | 0.837<br>(0.829, 0.846) | 5.0x10 <sup>-3</sup><br>(4.8,5.2) x10 <sup>-3</sup> | 0.106<br>(0.094, 0.118)                       | 0.115<br>(0.102, 0.129)                           | 0.994<br>(0.994, 0.995)                           | 0.098<br>(0.086, 0.110)                   |
| Ensemble:                                                                                                            | 0.836<br>(0.828, 0.844) | 5.0x10 <sup>-3</sup><br>(4.8,5.2) x10 <sup>-3</sup> | 0.105<br>(0.092, 0.117)                       | 0.114<br>(0.100, 0.127)                           | 0.995<br>(0.994, 0.995)                           | 0.097<br>(0.086, 0.109)                   |
| LR/ANN                                                                                                               | 0.839<br>(0.831, 0.847) | 5.0x10 <sup>-3</sup><br>(4.8,5.2) x10 <sup>-3</sup> | 0.105<br>(0.093, 0.118)                       | 0.114<br>(0.101, 0.128)                           | 0.995<br>(0.994, 0.995)                           | 0.098<br>(0.086, 0.110)                   |
| Ensemble:                                                                                                            |                         |                                                     |                                               |                                                   |                                                   |                                           |
| LR/RF/ANN                                                                                                            |                         |                                                     |                                               |                                                   |                                                   |                                           |



**Supplementary Table 8 continued.** Prediction performance in validation data for **suicide attempt in the 90 days** following an outpatient mental health specialty visit across race and ethnicity; 95% confidence intervals constructed using 10,000 bootstrap samples. AUC = area under the receiver operating curve; PPV = positive predictive value; LR=logistic regression (after lasso variable selection); RF=random forests; ANN=artificial neural network.

| Prediction Model                                                                                                        | AUC (95% CI)            | Brier score (95% CI)                                | F-score, 99 <sup>th</sup> percentile (95% CI) | Sensitivity, 99 <sup>th</sup> percentile (95% CI) | Specificity, 99 <sup>th</sup> percentile (95% CI) | PPV, 99 <sup>th</sup> percentile (95% CI) |
|-------------------------------------------------------------------------------------------------------------------------|-------------------------|-----------------------------------------------------|-----------------------------------------------|---------------------------------------------------|---------------------------------------------------|-------------------------------------------|
| Native Hawaiian / Pacific Islander (N visits (events) training: 112,581 (732); N visits (events) testing: 48,880 (296)) |                         |                                                     |                                               |                                                   |                                                   |                                           |
| OP                                                                                                                      | 0.830<br>(0.808, 0.851) | 5.8x10 <sup>-3</sup><br>(5.2,6.5) x10 <sup>-3</sup> | 0.145<br>(0.108, 0.182)                       | 0.155<br>(0.115, 0.197)                           | 0.994<br>(0.993, 0.995)                           | 0.135<br>(0.100, 0.172)                   |
| LR                                                                                                                      | 0.843<br>(0.820, 0.865) | 5.8x10 <sup>-3</sup><br>(5.2,6.4) x10 <sup>-3</sup> | 0.144<br>(0.112, 0.178)                       | 0.189<br>(0.146, 0.234)                           | 0.991<br>(0.990, 0.992)                           | 0.117<br>(0.089, 0.146)                   |
| RF                                                                                                                      | 0.805<br>(0.778, 0.831) | 5.9x10 <sup>-3</sup><br>(5.3,6.6) x10 <sup>-3</sup> | 0.089<br>(0.057, 0.123)                       | 0.081<br>(0.051, 0.113)                           | 0.996<br>(0.995, 0.996)                           | 0.100<br>(0.064, 0.139)                   |
| ANN                                                                                                                     | 0.839<br>(0.816, 0.862) | 5.8x10 <sup>-3</sup><br>(5.2,6.4) x10 <sup>-3</sup> | 0.160<br>(0.121, 0.198)                       | 0.172<br>(0.130, 0.217)                           | 0.994<br>(0.993, 0.995)                           | 0.149<br>(0.112, 0.188)                   |
| Ensemble:                                                                                                               | 0.833<br>(0.809, 0.856) | 5.8x10 <sup>-3</sup><br>(5.2,6.4) x10 <sup>-3</sup> | 0.139<br>(0.105, 0.174)                       | 0.166<br>(0.125, 0.209)                           | 0.993<br>(0.992, 0.993)                           | 0.120<br>(0.090, 0.152)                   |
| LR/RF                                                                                                                   | 0.830<br>(0.807, 0.853) | 5.8x10 <sup>-3</sup><br>(5.2,6.5) x10 <sup>-3</sup> | 0.139<br>(0.102, 0.177)                       | 0.142<br>(0.104, 0.183)                           | 0.995<br>(0.994, 0.995)                           | 0.136<br>(0.099, 0.176)                   |
| Ensemble:                                                                                                               | 0.844<br>(0.821, 0.866) | 5.8x10 <sup>-3</sup><br>(5.1,6.4) x10 <sup>-3</sup> | 0.151<br>(0.116, 0.187)                       | 0.186<br>(0.143, 0.231)                           | 0.992<br>(0.991, 0.993)                           | 0.127<br>(0.097, 0.160)                   |
| LR/ANN                                                                                                                  | 0.838<br>(0.815, 0.860) | 5.8x10 <sup>-3</sup><br>(5.2,6.4) x10 <sup>-3</sup> | 0.143<br>(0.108, 0.178)                       | 0.169<br>(0.128, 0.212)                           | 0.993<br>(0.992, 0.993)                           | 0.124<br>(0.093, 0.157)                   |
| LR/RF/ANN                                                                                                               |                         |                                                     |                                               |                                                   |                                                   |                                           |
| Non-Hispanic white (N visits (events) training: 6,130,341 (42,028); N visits (events) testing: 2,630,268 (18,569))      |                         |                                                     |                                               |                                                   |                                                   |                                           |
| OP                                                                                                                      | 0.852<br>(0.849, 0.854) | 6.8x10 <sup>-3</sup><br>(6.7,6.9) x10 <sup>-3</sup> | 0.124<br>(0.120, 0.128)                       | 0.165<br>(0.159, 0.170)                           | 0.989<br>(0.989, 0.990)                           | 0.100<br>(0.097, 0.103)                   |
| LR                                                                                                                      | 0.856<br>(0.853, 0.859) | 6.8x10 <sup>-3</sup><br>(6.7,6.9) x10 <sup>-3</sup> | 0.132<br>(0.128, 0.136)                       | 0.187<br>(0.181, 0.193)                           | 0.988<br>(0.988, 0.988)                           | 0.102<br>(0.099, 0.106)                   |
| RF                                                                                                                      | 0.851<br>(0.849, 0.854) | 6.8x10 <sup>-3</sup><br>(6.7,6.9) x10 <sup>-3</sup> | 0.139<br>(0.134, 0.143)                       | 0.181<br>(0.176, 0.187)                           | 0.990<br>(0.990, 0.990)                           | 0.112<br>(0.108, 0.116)                   |
| ANN                                                                                                                     | 0.857<br>(0.855, 0.860) | 6.8x10 <sup>-3</sup><br>(6.7,6.9) x10 <sup>-3</sup> | 0.137<br>(0.133, 0.142)                       | 0.177<br>(0.171, 0.182)                           | 0.990<br>(0.990, 0.990)                           | 0.112<br>(0.109, 0.116)                   |
| Ensemble:                                                                                                               | 0.862<br>(0.859, .865)  | 6.8x10 <sup>-3</sup><br>(6.7,6.9) x10 <sup>-3</sup> | 0.138<br>(0.133, 0.142)                       | 0.190<br>(0.184, 0.195)                           | 0.989<br>(0.989, 0.989)                           | 0.108<br>(0.105, 0.111)                   |
| LR/RF                                                                                                                   | 0.862<br>(0.859, 0.864) | 6.8x10 <sup>-3</sup><br>(6.7,6.9) x10 <sup>-3</sup> | 0.140<br>(0.136, 0.144)                       | 0.181<br>(0.176, 0.187)                           | 0.990<br>(0.990, 0.990)                           | 0.114<br>(0.111, 0.118)                   |
| Ensemble:                                                                                                               | 0.859<br>(0.856, 0.862) | 6.8x10 <sup>-3</sup><br>(6.7,6.9) x10 <sup>-3</sup> | 0.136<br>(0.131, 0.140)                       | 0.185<br>(0.180, 0.191)                           | 0.989<br>(0.989, 0.989)                           | 0.107<br>(0.103, 0.110)                   |
| LR/ANN                                                                                                                  | 0.863<br>(0.861, 0.866) | 6.8x10 <sup>-3</sup><br>(6.7,6.9) x10 <sup>-3</sup> | 0.189<br>(0.139, 0.14)                        | 0.189<br>(0.183, 0.195)                           | 0.989<br>(0.989, 0.989)                           | 0.110<br>(0.107, 0.114)                   |
| LR/RF/ANN                                                                                                               |                         |                                                     |                                               |                                                   |                                                   |                                           |
| Hispanic (N visits (events) training: 2,589,816 (16,293); N visits (events) testing: 1,120,187 (6,991))                 |                         |                                                     |                                               |                                                   |                                                   |                                           |
| OP                                                                                                                      | 0.848<br>(0.844, 0.852) | 6.0x10 <sup>-3</sup><br>(5.9,6.1) x10 <sup>-3</sup> | 0.142 (0.135, 0.14)                           | 0.173<br>(0.164, 0.182)                           | 0.992<br>(0.992, 0.992)                           | 0.121<br>(0.114, 0.127)                   |
| LR                                                                                                                      | 0.845<br>(0.840, 0.849) | 6.1x10 <sup>-3</sup><br>(6.0,6.2) x10 <sup>-3</sup> | 0.137 (0.131, 0.14)                           | 0.187<br>(0.178, 0.197)                           | 0.990<br>(0.990, 0.990)                           | 0.108<br>(0.103, 0.114)                   |
| RF                                                                                                                      | 0.844<br>(0.839, 0.849) | 6.0x10 <sup>-3</sup><br>(5.9,6.1) x10 <sup>-3</sup> | 0.140 (0.133, 0.14)                           | 0.175<br>(0.166, 0.184)                           | 0.992<br>(0.991, 0.992)                           | 0.116<br>(0.110, 0.122)                   |
| ANN                                                                                                                     | 0.849<br>(0.844, 0.853) | 6.0x10 <sup>-3</sup><br>(5.9,6.1) x10 <sup>-3</sup> | 0.140 (0.133, 0.14)                           | 0.180<br>(0.171, 0.189)                           | 0.991<br>(0.991, 0.991)                           | 0.114<br>(0.108, 0.120)                   |
| Ensemble:                                                                                                               | 0.853<br>(0.849, 0.858) | 6.0x10 <sup>-3</sup><br>(5.8,6.1) x10 <sup>-3</sup> | 0.142 (0.135, 0.14)                           | 0.188<br>(0.178, 0.197)                           | 0.991<br>(0.991, 0.991)                           | 0.114<br>(0.108, 0.120)                   |
| LR/RF                                                                                                                   | 0.853<br>(0.849, 0.857) | 6.0x10 <sup>-3</sup><br>(5.9,6.1) x10 <sup>-3</sup> | 0.144 (0.136, 0.15)                           | 0.183<br>(0.174, 0.192)                           | 0.991<br>(0.991, 0.992)                           | 0.118<br>(0.112, 0.124)                   |
| Ensemble:                                                                                                               | 0.850<br>(0.845, 0.854) | 6.0x10 <sup>-3</sup><br>(5.9,6.1) x10 <sup>-3</sup> | 0.191<br>(0.142, 0.135, 0.14)                 | 0.191<br>(0.182, 0.200)                           | 0.991<br>(0.990, 0.991)                           | 0.113<br>(0.107, 0.119)                   |
| LR/ANN                                                                                                                  | 0.854<br>(0.850, 0.859) | 6.0x10 <sup>-3</sup><br>(5.8,6.1) x10 <sup>-3</sup> | 0.189<br>(0.143, 0.136, 0.15)                 | 0.189<br>(0.180, 0.198)                           | 0.991<br>(0.991, 0.991)                           | 0.115<br>(0.110, 0.121)                   |
| LR/RF/ANN                                                                                                               |                         |                                                     |                                               |                                                   |                                                   |                                           |

**Supplementary Table 8 continued.** Prediction performance in validation data for **suicide attempt in the 90 days** following an outpatient mental health specialty visit across race and ethnicity; 95% confidence intervals constructed using 10,000 bootstrap samples. AUC = area under the receiver operating curve; PPV = positive predictive value; LR=logistic regression (after lasso variable selection); RF=random forests; ANN=artificial neural network.

| Prediction Model                                                                                     | AUC (95% CI)            | Brier score (95% CI)                                | F-score, 99 <sup>th</sup> percentile (95% CI) | Sensitivity, 99 <sup>th</sup> percentile (95% CI) | Specificity, 99 <sup>th</sup> percentile (95% CI) | PPV, 99 <sup>th</sup> percentile (95% CI) |
|------------------------------------------------------------------------------------------------------|-------------------------|-----------------------------------------------------|-----------------------------------------------|---------------------------------------------------|---------------------------------------------------|-------------------------------------------|
| Race Unknown (N visits (events) training: 356,691 (1,628); N visits (events) testing: 147,921 (663)) |                         |                                                     |                                               |                                                   |                                                   |                                           |
| OP                                                                                                   | 0.755<br>(0.734, 0.775) | 4.5x10 <sup>-3</sup><br>(4.1,4.8) x10 <sup>-3</sup> | 0.054<br>(0.037, 0.072)                       | 0.048<br>(0.033, 0.065)                           | 0.997<br>(0.996, 0.997)                           | 0.061<br>(0.042, 0.081)                   |
| LR                                                                                                   | 0.775<br>(0.756, 0.794) | 4.5x10 <sup>-3</sup><br>(4.1,4.8) x10 <sup>-3</sup> | 0.068<br>(0.050, 0.087)                       | 0.068<br>(0.050, 0.087)                           | 0.996<br>(0.996, 0.996)                           | 0.069<br>(0.050, 0.088)                   |
| RF                                                                                                   | 0.788<br>(0.769, 0.805) | 4.4x10 <sup>-3</sup><br>(4.1,4.7) x10 <sup>-3</sup> | 0.074<br>(0.055, 0.094)                       | 0.071<br>(0.052, 0.091)                           | 0.996<br>(0.996, 0.996)                           | 0.077<br>(0.057, 0.099)                   |
| ANN                                                                                                  | 0.770<br>(0.751, 0.789) | 4.4x10 <sup>-3</sup><br>(4.1,4.7) x10 <sup>-3</sup> | 0.086<br>(0.064, 0.108)                       | 0.078<br>(0.059, 0.100)                           | 0.997<br>(0.996, 0.997)                           | 0.095<br>(0.071, 0.121)                   |
| Ensemble:<br>LR/RF                                                                                   | 0.797<br>(0.779, 0.813) | 4.4x10 <sup>-3</sup><br>(4.1,4.8) x10 <sup>-3</sup> | 0.087<br>(0.066, 0.109)                       | 0.081<br>(0.061, 0.102)                           | 0.996<br>(0.996, 0.997)                           | 0.094<br>(0.071, 0.118)                   |
| Ensemble:<br>RF/ANN                                                                                  | 0.789<br>(0.771, 0.806) | 4.4x10 <sup>-3</sup><br>(4.1,4.7) x10 <sup>-3</sup> | 0.077<br>(0.057, 0.099)                       | 0.069<br>(0.051, 0.089)                           | 0.997<br>(0.996, 0.997)                           | 0.087<br>(0.064, 0.112)                   |
| Ensemble:<br>LR/ANN                                                                                  | 0.775<br>(0.756, 0.794) | 4.4x10 <sup>-3</sup><br>(4.1,4.8) x10 <sup>-3</sup> | 0.072<br>(0.053, 0.092)                       | 0.069<br>(0.051, 0.089)                           | 0.996<br>(0.996, 0.996)                           | 0.075<br>(0.055, 0.097)                   |
| Ensemble:<br>LR/RF/ANN                                                                               | 0.792<br>(0.774, 0.809) | 4.4x10 <sup>-3</sup><br>(4.1,4.7) x10 <sup>-3</sup> | 0.086<br>(0.065, 0.108)                       | 0.080<br>(0.060, 0.101)                           | 0.996<br>(0.996, 0.997)                           | 0.093<br>(0.070, 0.117)                   |

**Supplementary Table 9.** Prediction performance in validation data for **suicide attempt in the 90 days** following an outpatient mental health specialty visit across sex; 95% confidence intervals constructed using 10,000 bootstrap samples. AUC = area under the receiver operating curve; PPV = positive predictive value; LR=logistic regression (after lasso variable selection); RF=random forests; ANN=artificial neural network

| Prediction Model                                                                                       | AUC (95% CI)            | Brier score (95% CI)                               | F-score, 99 <sup>th</sup> percentile (95% CI) | Sensitivity, 99 <sup>th</sup> percentile (95% CI) | Specificity, 99 <sup>th</sup> percentile (95% CI) | PPV, 99 <sup>th</sup> percentile (95% CI) |
|--------------------------------------------------------------------------------------------------------|-------------------------|----------------------------------------------------|-----------------------------------------------|---------------------------------------------------|---------------------------------------------------|-------------------------------------------|
| Female (N visits (events) training: 6,809,585 (46,636); N visits (events) testing: 2,917,535 (20,790)) |                         |                                                    |                                               |                                                   |                                                   |                                           |
| OP                                                                                                     | 0.858<br>(0.855, 0.861) | $6.9 \times 10^{-3}$<br>(6.8,7.0) $\times 10^{-3}$ | 0.137<br>(0.133, 0.141)                       | 0.186<br>(0.181, 0.191)                           | 0.989<br>(0.989, 0.989)                           | 0.108<br>(0.105, 0.112)                   |
| LR                                                                                                     | 0.858<br>(0.855, 0.860) | $6.9 \times 10^{-3}$<br>(6.8,7.0) $\times 10^{-3}$ | 0.141<br>(0.138, 0.145)                       | 0.202<br>(0.197, 0.207)                           | 0.988<br>(0.988, 0.988)                           | 0.109<br>(0.106, 0.112)                   |
| RF                                                                                                     | 0.853<br>(0.851, 0.856) | $6.8 \times 10^{-3}$<br>(6.7,7.0) $\times 10^{-3}$ | 0.146<br>(0.142, 0.150)                       | 0.191<br>(0.186, 0.196)                           | 0.990<br>(0.990, 0.990)                           | 0.118<br>(0.115, 0.122)                   |
| ANN                                                                                                    | 0.860<br>(0.857, 0.862) | $6.8 \times 10^{-3}$<br>(6.7,6.9) $\times 10^{-3}$ | 0.147<br>(0.143, 0.151)                       | 0.195<br>(0.190, 0.201)                           | 0.989<br>(0.989, 0.990)                           | 0.118<br>(0.114, 0.121)                   |
| Ensemble:                                                                                              | 0.863<br>(0.861, 0.866) | $6.8 \times 10^{-3}$<br>(6.7,6.9) $\times 10^{-3}$ | 0.147<br>(0.144, 0.151)                       | 0.204<br>(0.199, 0.210)                           | 0.989<br>(0.989, 0.989)                           | 0.115<br>(0.112, 0.119)                   |
| LR/RF                                                                                                  | 0.863<br>(0.861, 0.866) | $6.8 \times 10^{-3}$<br>(6.7,6.9) $\times 10^{-3}$ | 0.149<br>(0.145, 0.153)                       | 0.196<br>(0.190, 0.201)                           | 0.990<br>(0.990, 0.990)                           | 0.120<br>(0.116, 0.123)                   |
| Ensemble:                                                                                              | 0.861<br>(0.858, 0.864) | $6.8 \times 10^{-3}$<br>(6.7,6.9) $\times 10^{-3}$ | 0.145<br>(0.141, 0.149)                       | 0.203<br>(0.198, 0.208)                           | 0.989<br>(0.988, 0.989)                           | 0.113<br>(0.110, 0.116)                   |
| LR/ANN                                                                                                 | 0.865<br>(0.862, 0.867) | $6.8 \times 10^{-3}$<br>(6.7,6.9) $\times 10^{-3}$ | 0.204<br>(0.145, 0.1)                         | 0.989<br>(0.199, 0.210)                           | 0.989<br>(0.989, 0.989)                           | 0.117<br>(0.114, 0.120)                   |
| LR/RF/ANN                                                                                              |                         |                                                    |                                               |                                                   |                                                   |                                           |
| Male (N visits (events) training: 3,863,780 (21,543); N visits (events) testing: 1,657,088 (9,120))    |                         |                                                    |                                               |                                                   |                                                   |                                           |
| OP                                                                                                     | 0.825<br>(0.821, 0.829) | $5.4 \times 10^{-3}$<br>(5.3,5.5) $\times 10^{-3}$ | 0.095<br>(0.089, 0.101)                       | 0.100<br>(0.094, 0.106)                           | 0.994<br>(0.994, 0.995)                           | 0.091<br>(0.085, 0.096)                   |
| LR                                                                                                     | 0.832<br>(0.828, 0.837) | $5.4 \times 10^{-3}$<br>(5.3,5.5) $\times 10^{-3}$ | 0.106<br>(0.101, 0.112)                       | 0.132<br>(0.125, 0.139)                           | 0.993<br>(0.992, 0.993)                           | 0.089<br>(0.084, 0.094)                   |
| RF                                                                                                     | 0.831<br>(0.827, 0.835) | $5.4 \times 10^{-3}$<br>(5.3,5.5) $\times 10^{-3}$ | 0.107<br>(0.101, 0.112)                       | 0.128<br>(0.121, 0.135)                           | 0.993<br>(0.993, 0.993)                           | 0.092<br>(0.087, 0.097)                   |
| ANN                                                                                                    | 0.836<br>(0.831, 0.840) | $5.4 \times 10^{-3}$<br>(5.2,5.5) $\times 10^{-3}$ | 0.107<br>(0.101, 0.113)                       | 0.118<br>(0.111, 0.125)                           | 0.994<br>(0.994, 0.994)                           | 0.098<br>(0.092, 0.103)                   |
| Ensemble:                                                                                              | 0.841<br>(0.837, 0.845) | $5.4 \times 10^{-3}$<br>(5.4,5.5) $\times 10^{-3}$ | 0.110<br>(0.104, 0.115)                       | 0.134<br>(0.127, 0.141)                           | 0.993<br>(0.993, 0.993)                           | 0.093<br>(0.088, 0.098)                   |
| LR/RF                                                                                                  | 0.841<br>(0.837, 0.845) | $5.3 \times 10^{-3}$<br>(5.2,5.5) $\times 10^{-3}$ | 0.110<br>(0.104, 0.116)                       | 0.126<br>(0.119, 0.133)                           | 0.994<br>(0.993, 0.994)                           | 0.097<br>(0.092, 0.103)                   |
| Ensemble:                                                                                              | 0.837<br>(0.832, 0.841) | $5.4 \times 10^{-3}$<br>(5.3,5.5) $\times 10^{-3}$ | 0.108<br>(0.103, 0.114)                       | 0.128<br>(0.121, 0.135)                           | 0.993<br>(0.993, 0.9)                             | 0.094<br>(0.089, 0.099)                   |
| LR/ANN                                                                                                 | 0.843<br>(0.839, 0.847) | $5.3 \times 10^{-3}$<br>(5.2,5.5) $\times 10^{-3}$ | 0.111<br>(0.105, 0.116)                       | 0.131<br>(0.125, 0.138)                           | 0.993<br>(0.993, 0.9)                             | 0.095<br>(0.090, 0.101)                   |
| Ensemble:                                                                                              |                         |                                                    |                                               |                                                   |                                                   |                                           |
| LR/RF/ANN                                                                                              |                         |                                                    |                                               |                                                   |                                                   |                                           |

**Supplementary Table 10** Prediction performance in validation data for **suicide attempt in the 90 days** following an outpatient general medical visit with a mental health diagnosis across race and ethnicity; 95% confidence intervals constructed using 10,000 bootstrap samples. AUC = Area under the receiver operating curve; PPV = Positive predicted value; OP: original parsimonious; LR=Logistic regression with Lasso variable selection; RF = random forest; ANN = artificial neural network

| Prediction Model                                                                                                    | AUC (95% CI)            | Brier score (95% CI)                                                   | F-score, 99 <sup>th</sup> percentile (95% CI) | Sensitivity, 99 <sup>th</sup> percentile (95% CI) | Specificity, 99 <sup>th</sup> percentile (95% CI) | PPV, 99 <sup>th</sup> percentile (95% CI) |
|---------------------------------------------------------------------------------------------------------------------|-------------------------|------------------------------------------------------------------------|-----------------------------------------------|---------------------------------------------------|---------------------------------------------------|-------------------------------------------|
| America Indian / Alaskan Native (N visits (events) training: 83,460 (399); N visits (events) testing: 37,278 (233)) |                         |                                                                        |                                               |                                                   |                                                   |                                           |
| OP                                                                                                                  | 0.820<br>(0.789, 0.850) | 6.1x10 <sup>-3</sup><br>(5.4x10 <sup>-3</sup> , 6.9x10 <sup>-3</sup> ) | 0.099<br>(0.073, 0.127)                       | 0.193<br>(0.143, 0.245)                           | 0.983<br>(0.982, 0.984)                           | 0.067<br>(0.048, 0.086)                   |
| LR                                                                                                                  | 0.831<br>(0.807, 0.853) | 6.1x10 <sup>-3</sup><br>(5.4x10 <sup>-3</sup> , 6.9x10 <sup>-3</sup> ) | 0.083<br>(0.059, 0.107)                       | 0.176<br>(0.128, 0.226)                           | 0.981<br>(0.979, 0.982)                           | 0.055<br>(0.039, 0.071)                   |
| RF                                                                                                                  | 0.847<br>(0.821, 0.872) | 6.1x10 <sup>-3</sup><br>(5.3x10 <sup>-3</sup> , 6.9x10 <sup>-3</sup> ) | 0.074<br>(0.050, 0.098)                       | 0.137<br>(0.093, 0.182)                           | 0.984<br>(0.982, 0.985)                           | 0.051<br>(0.034, 0.068)                   |
| ANN                                                                                                                 | 0.857<br>(0.832, 0.880) | 6.1x10 <sup>-3</sup><br>(5.3x10 <sup>-3</sup> , 6.9x10 <sup>-3</sup> ) | 0.081<br>(0.057, 0.105)                       | 0.163<br>(0.116, 0.212)                           | 0.982<br>(0.981, 0.983)                           | 0.054<br>(0.037, 0.070)                   |
| Ensemble:<br>LR/RF                                                                                                  | 0.853<br>(0.829, 0.876) | 6.1x10 <sup>-3</sup><br>(5.3x10 <sup>-3</sup> , 6.9x10 <sup>-3</sup> ) | 0.070<br>(0.047, 0.092)                       | 0.142<br>(0.097, 0.187)                           | 0.982<br>(0.980, 0.983)                           | 0.046<br>(0.031, 0.062)                   |
| Ensemble:<br>RF/ANN                                                                                                 | 0.855<br>(0.830, 0.880) | 6.1x10 <sup>-3</sup><br>(5.3x10 <sup>-3</sup> , 6.9x10 <sup>-3</sup> ) | 0.088<br>(0.063, 0.113)                       | 0.176<br>(0.127, 0.226)                           | 0.982<br>(0.981, 0.984)                           | 0.058<br>(0.042, 0.076)                   |
| Ensemble:<br>LR/ANN                                                                                                 | 0.850<br>(0.826, 0.872) | 6.1x10 <sup>-3</sup><br>(5.3x10 <sup>-3</sup> , 6.9x10 <sup>-3</sup> ) | 0.084<br>(0.060, 0.108)                       | 0.176<br>(0.127, 0.226)                           | 0.981<br>(0.980, 0.982)                           | 0.055<br>(0.039, 0.072)                   |
| Ensemble:<br>LR/RF/ANN                                                                                              | 0.855<br>(0.830, 0.879) | 6.1x10 <sup>-3</sup><br>(5.3x10 <sup>-3</sup> , 6.9x10 <sup>-3</sup> ) | 0.081<br>(0.057, 0.105)                       | 0.163<br>(0.116, 0.211)                           | 0.982<br>(0.981, 0.983)                           | 0.054<br>(0.038, 0.071)                   |
| Asian (N visits (events) training: 377,044 (890); N visits (events) testing: 163,118 (417))                         |                         |                                                                        |                                               |                                                   |                                                   |                                           |
| OP                                                                                                                  | 0.824<br>(0.801, 0.847) | 2.5x10 <sup>-3</sup><br>(2.3x10 <sup>-3</sup> , 2.8x10 <sup>-3</sup> ) | 0.100<br>(0.080, 0.121)                       | 0.189<br>(0.152, 0.229)                           | 0.993<br>(0.993, 0.994)                           | 0.068<br>(0.054, 0.083)                   |
| LR                                                                                                                  | 0.821<br>(0.798, 0.843) | 2.5x10 <sup>-3</sup><br>(2.3x10 <sup>-3</sup> , 2.8x10 <sup>-3</sup> ) | 0.097<br>(0.077, 0.118)                       | 0.177<br>(0.141, 0.215)                           | 0.994<br>(0.993, 0.994)                           | 0.067<br>(0.053, 0.082)                   |
| RF                                                                                                                  | 0.817<br>(0.795, 0.840) | 2.5x10 <sup>-3</sup><br>(2.3x10 <sup>-3</sup> , 2.8x10 <sup>-3</sup> ) | 0.083<br>(0.066, 0.102)                       | 0.173<br>(0.137, 0.209)                           | 0.992<br>(0.992, 0.993)                           | 0.055<br>(0.043, 0.068)                   |
| ANN                                                                                                                 | 0.819<br>(0.796, 0.842) | 2.5x10 <sup>-3</sup><br>(2.3x10 <sup>-3</sup> , 2.7x10 <sup>-3</sup> ) | 0.103<br>(0.083, 0.124)                       | 0.197<br>(0.159, 0.236)                           | 0.993<br>(0.993, 0.994)                           | 0.070<br>(0.056, 0.085)                   |
| Ensemble:<br>LR/RF                                                                                                  | 0.826<br>(0.804, 0.848) | 2.5x10 <sup>-3</sup><br>(2.3x10 <sup>-3</sup> , 2.8x10 <sup>-3</sup> ) | 0.093<br>(0.074, 0.113)                       | 0.182<br>(0.146, 0.220)                           | 0.993<br>(0.993, 0.993)                           | 0.062<br>(0.049, 0.076)                   |
| Ensemble:<br>RF/ANN                                                                                                 | 0.825<br>(0.803, 0.847) | 2.5x10 <sup>-3</sup><br>(2.3x10 <sup>-3</sup> , 2.7x10 <sup>-3</sup> ) | 0.100<br>(0.081, 0.120)                       | 0.201<br>(0.164, 0.241)                           | 0.993<br>(0.992, 0.993)                           | 0.066<br>(0.053, 0.080)                   |
| Ensemble:<br>LR/ANN                                                                                                 | 0.822<br>(0.799, 0.844) | 2.5x10 <sup>-3</sup><br>(2.3x10 <sup>-3</sup> , 2.8x10 <sup>-3</sup> ) | 0.099<br>(0.079, 0.120)                       | 0.187<br>(0.150, 0.225)                           | 0.993<br>(0.993, 0.994)                           | 0.068<br>(0.054, 0.083)                   |
| Ensemble:<br>LR/RF/ANN                                                                                              | 0.827<br>(0.805, 0.849) | 2.5x10 <sup>-3</sup><br>(2.3x10 <sup>-3</sup> , 2.7x10 <sup>-3</sup> ) | 0.095<br>(0.076, 0.115)                       | 0.185<br>(0.148, 0.222)                           | 0.993<br>(0.993, 0.993)                           | 0.064<br>(0.051, 0.078)                   |
| Black / African American (N visits (events) training: 586,268 (1,752); N visits (events) testing: 251,759 (832))    |                         |                                                                        |                                               |                                                   |                                                   |                                           |
| OP                                                                                                                  | 0.841<br>(0.826, 0.856) | 3.2x10 <sup>-3</sup><br>(3.0x10 <sup>-3</sup> , 3.5x10 <sup>-3</sup> ) | 0.103<br>(0.088, 0.120)                       | 0.165<br>(0.140, 0.190)                           | 0.993<br>(0.993, 0.994)                           | 0.075<br>(0.064, 0.088)                   |
| LR                                                                                                                  | 0.827<br>(0.812, 0.842) | 3.2x10 <sup>-3</sup><br>(3.0x10 <sup>-3</sup> , 3.5x10 <sup>-3</sup> ) | 0.102<br>(0.087, 0.117)                       | 0.189<br>(0.162, 0.216)                           | 0.992<br>(0.991, 0.992)                           | 0.070<br>(0.060, 0.081)                   |
| RF                                                                                                                  | 0.835<br>(0.820, 0.849) | 3.2x10 <sup>-3</sup><br>(3.0x10 <sup>-3</sup> , 3.4x10 <sup>-3</sup> ) | 0.095<br>(0.082, 0.108)                       | 0.201<br>(0.174, 0.228)                           | 0.990<br>(0.990, 0.990)                           | 0.062<br>(0.053, 0.071)                   |
| ANN                                                                                                                 | 0.835<br>(0.821, 0.849) | 3.2x10 <sup>-3</sup><br>(3.0x10 <sup>-3</sup> , 3.4x10 <sup>-3</sup> ) | 0.111<br>(0.096, 0.127)                       | 0.204<br>(0.177, 0.233)                           | 0.992<br>(0.991, 0.992)                           | 0.076<br>(0.066, 0.088)                   |
| Ensemble:<br>LR/RF                                                                                                  | 0.843<br>(0.829, 0.857) | 3.2x10 <sup>-3</sup><br>(3.0x10 <sup>-3</sup> , 3.4x10 <sup>-3</sup> ) | 0.105<br>(0.091, 0.120)                       | 0.202<br>(0.175, 0.229)                           | 0.991<br>(0.991, 0.992)                           | 0.071<br>(0.061, 0.082)                   |
| Ensemble:<br>RF/ANN                                                                                                 | 0.842<br>(0.827, 0.856) | 3.2x10 <sup>-3</sup><br>(3.0x10 <sup>-3</sup> , 3.4x10 <sup>-3</sup> ) | 0.101<br>(0.087, 0.116)                       | 0.200<br>(0.173, 0.227)                           | 0.991<br>(0.991, 0.991)                           | 0.068<br>(0.058, 0.078)                   |
| Ensemble:<br>LR/ANN                                                                                                 | 0.834<br>(0.819, 0.849) | 3.2x10 <sup>-3</sup><br>(3.0x10 <sup>-3</sup> , 3.4x10 <sup>-3</sup> ) | 0.108<br>(0.093, 0.123)                       | 0.198<br>(0.171, 0.227)                           | 0.992<br>(0.991, 0.992)                           | 0.074<br>(0.063, 0.085)                   |
| Ensemble:<br>LR/RF/ANN                                                                                              | 0.843<br>(0.829, 0.857) | 3.2x10 <sup>-3</sup><br>(3.0x10 <sup>-3</sup> , 3.4x10 <sup>-3</sup> ) | 0.107<br>(0.092, 0.122)                       | 0.201<br>(0.174, 0.228)                           | 0.992<br>(0.991, 0.992)                           | 0.073<br>(0.063, 0.084)                   |

**Supplementary Table 10 continued.** Prediction performance in validation data for **suicide attempt in the 90 days** following an outpatient general medical visit with a mental health diagnosis across race and ethnicity; 95% confidence intervals constructed using 10,000 bootstrap samples. AUC = Area under the receiver operating curve; PPV = Positive predicted value; OP: original parsimonious; LR=Logistic regression with Lasso variable selection; RF = random forest; ANN = artificial neural network

| Prediction Model                                                                                                      | AUC (95% CI)            | Brier score (95% CI)                                                    | F-score, 99 <sup>th</sup> percentile (95% CI) | Sensitivity, 99 <sup>th</sup> percentile (95% CI) | Specificity, 99 <sup>th</sup> percentile (95% CI) | PPV, 99 <sup>th</sup> percentile (95% CI) |
|-----------------------------------------------------------------------------------------------------------------------|-------------------------|-------------------------------------------------------------------------|-----------------------------------------------|---------------------------------------------------|---------------------------------------------------|-------------------------------------------|
| Native Hawaiian / Pacific Islander (N visits (events) training: 66,571 (174); N visits (events) testing: 29,064 (96)) |                         |                                                                         |                                               |                                                   |                                                   |                                           |
| OP                                                                                                                    | 0.871<br>(0.830, 0.909) | $3.2 \times 10^{-3}$<br>( $2.6 \times 10^{-3}$ , $3.9 \times 10^{-3}$ ) | 0.115<br>(0.073, 0.160)                       | 0.229<br>(0.148, 0.317)                           | 0.991<br>(0.990, 0.992)                           | 0.077<br>(0.048, 0.109)                   |
| LR                                                                                                                    | 0.868<br>(0.826, 0.907) | $3.2 \times 10^{-3}$<br>( $2.6 \times 10^{-3}$ , $3.8 \times 10^{-3}$ ) | 0.132<br>(0.087, 0.179)                       | 0.260<br>(0.174, 0.351)                           | 0.991<br>(0.990, 0.992)                           | 0.088<br>(0.057, 0.122)                   |
| RF                                                                                                                    | 0.854<br>(0.808, 0.896) | $3.2 \times 10^{-3}$<br>( $2.6 \times 10^{-3}$ , $3.8 \times 10^{-3}$ ) | 0.108<br>(0.067, 0.153)                       | 0.219<br>(0.138, 0.307)                           | 0.991<br>(0.989, 0.992)                           | 0.072<br>(0.043, 0.103)                   |
| ANN                                                                                                                   | 0.873<br>(0.831, 0.910) | $3.2 \times 10^{-3}$<br>( $2.6 \times 10^{-3}$ , $3.8 \times 10^{-3}$ ) | 0.124<br>(0.079, 0.171)                       | 0.240<br>(0.156, 0.330)                           | 0.991<br>(0.990, 0.992)                           | 0.083<br>(0.052, 0.117)                   |
| Ensemble:                                                                                                             | 0.867<br>(0.823, 0.907) | $3.2 \times 10^{-3}$<br>( $2.6 \times 10^{-3}$ , $3.8 \times 10^{-3}$ ) | 0.133<br>(0.087, 0.181)                       | 0.260<br>(0.174, 0.352)                           | 0.991<br>(0.990, 0.992)                           | 0.090<br>(0.057, 0.124)                   |
| LR/RF                                                                                                                 | 0.867<br>(0.823, 0.907) | $3.2 \times 10^{-3}$<br>( $2.6 \times 10^{-3}$ , $3.8 \times 10^{-3}$ ) | 0.127<br>(0.082, 0.173)                       | 0.250<br>(0.165, 0.341)                           | 0.991<br>(0.990, 0.992)                           | 0.085<br>(0.054, 0.119)                   |
| Ensemble:                                                                                                             | 0.873<br>(0.832, 0.911) | $3.2 \times 10^{-3}$<br>( $2.6 \times 10^{-3}$ , $3.8 \times 10^{-3}$ ) | 0.128<br>(0.083, 0.175)                       | 0.250<br>(0.167, 0.341)                           | 0.991<br>(0.990, 0.992)                           | 0.086<br>(0.055, 0.120)                   |
| LR/ANN                                                                                                                | 0.870<br>(0.827, 0.910) | $3.2 \times 10^{-3}$<br>( $2.6 \times 10^{-3}$ , $3.8 \times 10^{-3}$ ) | 0.124<br>(0.079, 0.170)                       | 0.240<br>(0.155, 0.330)                           | 0.991<br>(0.990, 0.992)                           | 0.084<br>(0.052, 0.118)                   |
| LR/RF/ANN                                                                                                             | 0.870<br>(0.827, 0.910) | $3.2 \times 10^{-3}$<br>( $2.6 \times 10^{-3}$ , $3.8 \times 10^{-3}$ ) | 0.124<br>(0.079, 0.170)                       | 0.240<br>(0.155, 0.330)                           | 0.991<br>(0.990, 0.992)                           | 0.084<br>(0.052, 0.118)                   |
| Non-Hispanic white (N visits (events) training: 4,521,388 (16,072); N visits (events) testing: 1,918,078 (6,940))     |                         |                                                                         |                                               |                                                   |                                                   |                                           |
| OP                                                                                                                    | 0.837<br>(0.832, 0.843) | $3.5 \times 10^{-3}$<br>( $3.4 \times 10^{-3}$ , $3.6 \times 10^{-3}$ ) | 0.110<br>(0.105, 0.115)                       | 0.235<br>(0.225, 0.245)                           | 0.989<br>(0.989, 0.989)                           | 0.072<br>(0.068, 0.075)                   |
| LR                                                                                                                    | 0.843<br>(0.838, 0.848) | $3.5 \times 10^{-3}$<br>( $3.4 \times 10^{-3}$ , $3.6 \times 10^{-3}$ ) | 0.107<br>(0.102, 0.112)                       | 0.229<br>(0.219, 0.239)                           | 0.989<br>(0.989, 0.989)                           | 0.070<br>(0.066, 0.073)                   |
| RF                                                                                                                    | 0.843<br>(0.838, 0.848) | $3.5 \times 10^{-3}$<br>( $3.4 \times 10^{-3}$ , $3.6 \times 10^{-3}$ ) | 0.100<br>(0.095, 0.105)                       | 0.217<br>(0.208, 0.227)                           | 0.989<br>(0.989, 0.989)                           | 0.065<br>(0.062, 0.068)                   |
| ANN                                                                                                                   | 0.841<br>(0.836, 0.846) | $3.5 \times 10^{-3}$<br>( $3.4 \times 10^{-3}$ , $3.6 \times 10^{-3}$ ) | 0.113<br>(0.108, 0.118)                       | 0.240<br>(0.231, 0.251)                           | 0.989<br>(0.989, 0.989)                           | 0.074<br>(0.070, 0.077)                   |
| Ensemble:                                                                                                             | 0.849<br>(0.844, 0.854) | $3.5 \times 10^{-3}$<br>( $3.4 \times 10^{-3}$ , $3.6 \times 10^{-3}$ ) | 0.109<br>(0.104, 0.114)                       | 0.236<br>(0.226, 0.246)                           | 0.989<br>(0.989, 0.989)                           | 0.071<br>(0.068, 0.074)                   |
| LR/RF                                                                                                                 | 0.848<br>(0.843, 0.853) | $3.5 \times 10^{-3}$<br>( $3.4 \times 10^{-3}$ , $3.6 \times 10^{-3}$ ) | 0.112<br>(0.107, 0.117)                       | 0.243<br>(0.233, 0.253)                           | 0.989<br>(0.989, 0.989)                           | 0.073<br>(0.070, 0.076)                   |
| Ensemble:                                                                                                             | 0.844<br>(0.838, 0.849) | $3.5 \times 10^{-3}$<br>( $3.4 \times 10^{-3}$ , $3.6 \times 10^{-3}$ ) | 0.111<br>(0.106, 0.116)                       | 0.240<br>(0.230, 0.250)                           | 0.989<br>(0.989, 0.989)                           | 0.072<br>(0.069, 0.076)                   |
| LR/ANN                                                                                                                | 0.848<br>(0.843, 0.853) | $3.5 \times 10^{-3}$<br>( $3.4 \times 10^{-3}$ , $3.6 \times 10^{-3}$ ) | 0.113<br>(0.108, 0.118)                       | 0.243<br>(0.233, 0.253)                           | 0.989<br>(0.989, 0.989)                           | 0.074<br>(0.070, 0.077)                   |
| Ensemble:                                                                                                             | 0.848<br>(0.843, 0.853) | $3.5 \times 10^{-3}$<br>( $3.4 \times 10^{-3}$ , $3.6 \times 10^{-3}$ ) | 0.113<br>(0.108, 0.118)                       | 0.243<br>(0.233, 0.253)                           | 0.989<br>(0.989, 0.989)                           | 0.074<br>(0.070, 0.077)                   |
| LR/RF/ANN                                                                                                             | 0.848<br>(0.843, 0.853) | $3.5 \times 10^{-3}$<br>( $3.4 \times 10^{-3}$ , $3.6 \times 10^{-3}$ ) | 0.113<br>(0.108, 0.118)                       | 0.243<br>(0.233, 0.253)                           | 0.989<br>(0.989, 0.989)                           | 0.074<br>(0.070, 0.077)                   |
| Hispanic (N visits (events) training: 1,600,730 (4,339); N visits (events) testing: 682,587 (1,863))                  |                         |                                                                         |                                               |                                                   |                                                   |                                           |
| OP                                                                                                                    | 0.843<br>(0.833, 0.853) | $2.7 \times 10^{-3}$<br>( $2.6 \times 10^{-3}$ , $2.8 \times 10^{-3}$ ) | 0.091<br>(0.082, 0.101)                       | 0.166<br>(0.149, 0.183)                           | 0.993<br>(0.993, 0.993)                           | 0.063<br>(0.056, 0.070)                   |
| LR                                                                                                                    | 0.839<br>(0.829, 0.849) | $2.7 \times 10^{-3}$<br>( $2.6 \times 10^{-3}$ , $2.8 \times 10^{-3}$ ) | 0.095<br>(0.085, 0.104)                       | 0.177<br>(0.160, 0.194)                           | 0.993<br>(0.993, 0.993)                           | 0.065<br>(0.058, 0.072)                   |
| RF                                                                                                                    | 0.833<br>(0.823, 0.843) | $2.7 \times 10^{-3}$<br>( $2.6 \times 10^{-3}$ , $2.8 \times 10^{-3}$ ) | 0.092<br>(0.084, 0.101)                       | 0.192<br>(0.174, 0.210)                           | 0.992<br>(0.992, 0.992)                           | 0.061<br>(0.055, 0.067)                   |
| ANN                                                                                                                   | 0.839<br>(0.829, 0.849) | $2.7 \times 10^{-3}$<br>( $2.6 \times 10^{-3}$ , $2.8 \times 10^{-3}$ ) | 0.100<br>(0.091, 0.110)                       | 0.184<br>(0.166, 0.202)                           | 0.993<br>(0.993, 0.993)                           | 0.069<br>(0.062, 0.076)                   |
| Ensemble:                                                                                                             | 0.843<br>(0.833, 0.853) | $2.7 \times 10^{-3}$<br>( $2.6 \times 10^{-3}$ , $2.8 \times 10^{-3}$ ) | 0.098<br>(0.088, 0.107)                       | 0.193<br>(0.175, 0.211)                           | 0.992<br>(0.992, 0.993)                           | 0.065<br>(0.059, 0.072)                   |
| LR/RF                                                                                                                 | 0.842<br>(0.832, 0.852) | $2.7 \times 10^{-3}$<br>( $2.6 \times 10^{-3}$ , $2.8 \times 10^{-3}$ ) | 0.101<br>(0.091, 0.110)                       | 0.201<br>(0.182, 0.219)                           | 0.992<br>(0.992, 0.993)                           | 0.067<br>(0.061, 0.074)                   |
| Ensemble:                                                                                                             | 0.842<br>(0.832, 0.851) | $2.7 \times 10^{-3}$<br>( $2.6 \times 10^{-3}$ , $2.8 \times 10^{-3}$ ) | 0.097<br>(0.087, 0.106)                       | 0.180<br>(0.163, 0.198)                           | 0.993<br>(0.993, 0.993)                           | 0.066<br>(0.059, 0.073)                   |
| LR/ANN                                                                                                                | 0.845<br>(0.835, 0.854) | $2.7 \times 10^{-3}$<br>( $2.6 \times 10^{-3}$ , $2.8 \times 10^{-3}$ ) | 0.098<br>(0.088, 0.107)                       | 0.189<br>(0.172, 0.208)                           | 0.993<br>(0.992, 0.993)                           | 0.066<br>(0.059, 0.073)                   |
| Ensemble:                                                                                                             | 0.845<br>(0.835, 0.854) | $2.7 \times 10^{-3}$<br>( $2.6 \times 10^{-3}$ , $2.8 \times 10^{-3}$ ) | 0.098<br>(0.088, 0.107)                       | 0.189<br>(0.172, 0.208)                           | 0.993<br>(0.992, 0.993)                           | 0.066<br>(0.059, 0.073)                   |
| LR/RF/ANN                                                                                                             | 0.845<br>(0.835, 0.854) | $2.7 \times 10^{-3}$<br>( $2.6 \times 10^{-3}$ , $2.8 \times 10^{-3}$ ) | 0.098<br>(0.088, 0.107)                       | 0.189<br>(0.172, 0.208)                           | 0.993<br>(0.992, 0.993)                           | 0.066<br>(0.059, 0.073)                   |

**Supplementary Table 10 continued.** Prediction performance in validation data for **suicide attempt in the 90 days** following an outpatient general medical visit with a mental health diagnosis across race and ethnicity; 95% confidence intervals constructed using 10,000 bootstrap samples. AUC = Area under the receiver operating curve; PPV = Positive predicted value; OP: original parsimonious; LR=Logistic regression with Lasso variable selection; RF = random forest; ANN = artificial neural network

| Prediction Model                                                                                  | AUC (95% CI)            | Brier score (95% CI)                                                    | F-score, 99 <sup>th</sup> percentile (95% CI) | Sensitivity, 99 <sup>th</sup> percentile (95% CI) | Specificity, 99 <sup>th</sup> percentile (95% CI) | PPV, 99 <sup>th</sup> percentile (95% CI) |
|---------------------------------------------------------------------------------------------------|-------------------------|-------------------------------------------------------------------------|-----------------------------------------------|---------------------------------------------------|---------------------------------------------------|-------------------------------------------|
| Race Unknown (N visits (events) training: 220,416 (772); N visits (events) testing: 93,637 (273)) |                         |                                                                         |                                               |                                                   |                                                   |                                           |
| OP                                                                                                | 0.832<br>(0.803, 0.860) | $2.8 \times 10^{-3}$<br>( $2.5 \times 10^{-3}$ , $3.2 \times 10^{-3}$ ) | 0.094<br>(0.069, 0.120)                       | 0.172<br>(0.129, 0.219)                           | 0.993<br>(0.992, 0.993)                           | 0.064<br>(0.047, 0.083)                   |
| LR                                                                                                | 0.801<br>(0.770, 0.832) | $2.8 \times 10^{-3}$<br>( $2.5 \times 10^{-3}$ , $3.2 \times 10^{-3}$ ) | 0.090<br>(0.065, 0.117)                       | 0.143<br>(0.103, 0.186)                           | 0.994<br>(0.994, 0.995)                           | 0.066<br>(0.047, 0.087)                   |
| RF                                                                                                | 0.816<br>(0.787, 0.844) | $2.8 \times 10^{-3}$<br>( $2.5 \times 10^{-3}$ , $3.2 \times 10^{-3}$ ) | 0.179<br>(0.144, 0.212)                       | 0.289<br>(0.235, 0.343)                           | 0.994<br>(0.994, 0.995)                           | 0.129<br>(0.103, 0.156)                   |
| ANN                                                                                               | 0.813<br>(0.784, 0.842) | $2.8 \times 10^{-3}$<br>( $2.5 \times 10^{-3}$ , $3.2 \times 10^{-3}$ ) | 0.097<br>(0.071, 0.126)                       | 0.150<br>(0.109, 0.193)                           | 0.994<br>(0.994, 0.995)                           | 0.072<br>(0.052, 0.094)                   |
| Ensemble:                                                                                         | 0.821<br>(0.792, 0.850) | $2.8 \times 10^{-3}$<br>( $2.5 \times 10^{-3}$ , $3.2 \times 10^{-3}$ ) | 0.132<br>(0.102, 0.163)                       | 0.212<br>(0.165, 0.263)                           | 0.994<br>(0.994, 0.995)                           | 0.096<br>(0.073, 0.120)                   |
| LR/RF                                                                                             | 0.825<br>(0.797, 0.853) | $2.8 \times 10^{-3}$<br>( $2.5 \times 10^{-3}$ , $3.2 \times 10^{-3}$ ) | 0.167<br>(0.134, 0.200)                       | 0.275<br>(0.223, 0.329)                           | 0.994<br>(0.994, 0.995)                           | 0.120<br>(0.095, 0.146)                   |
| Ensemble:                                                                                         | 0.810<br>(0.780, 0.840) | $2.8 \times 10^{-3}$<br>( $2.5 \times 10^{-3}$ , $3.2 \times 10^{-3}$ ) | 0.097<br>(0.071, 0.125)                       | 0.154<br>(0.112, 0.198)                           | 0.994<br>(0.994, 0.995)                           | 0.071<br>(0.051, 0.092)                   |
| LR/ANN                                                                                            | 0.823<br>(0.794, 0.851) | $2.8 \times 10^{-3}$<br>( $2.5 \times 10^{-3}$ , $3.2 \times 10^{-3}$ ) | 0.104<br>(0.076, 0.133)                       | 0.161<br>(0.119, 0.205)                           | 0.994<br>(0.994, 0.995)                           | 0.077<br>(0.056, 0.099)                   |
| Ensemble:                                                                                         |                         |                                                                         |                                               |                                                   |                                                   |                                           |
| LR/RF/ANN                                                                                         |                         |                                                                         |                                               |                                                   |                                                   |                                           |

**Supplementary Table 11.** Prediction performance in validation data for **suicide attempt in the 90 days** following an outpatient general medical visit with a mental health diagnosis across sex; 95% confidence intervals constructed using 10,000 bootstrap samples. AUC = Area under the receiver operating curve; PPV = Positive predicted value; OP: original parsimonious; LR=Logistic regression with Lasso variable selection; RF = random forest; ANN = artificial neural network

| Prediction Model                                                                                      | AUC (95% CI)            | Brier score (95% CI)                                                   | F-score, 99 <sup>th</sup> percentile (95% CI) | Sensitivity, 99 <sup>th</sup> percentile (95% CI) | Specificity, 99 <sup>th</sup> percentile (95% CI) | PPV, 99 <sup>th</sup> percentile (95% CI) |
|-------------------------------------------------------------------------------------------------------|-------------------------|------------------------------------------------------------------------|-----------------------------------------------|---------------------------------------------------|---------------------------------------------------|-------------------------------------------|
| Female (N visits (events) training: 4,658,689 (14,554); N visits (events) testing: 1,981,603 (6,598)) |                         |                                                                        |                                               |                                                   |                                                   |                                           |
| OP                                                                                                    | 0.850<br>(0.844, 0.855) | 3.3x10 <sup>-3</sup><br>(3.2x10 <sup>-3</sup> , 3.3x10 <sup>-3</sup> ) | 0.113<br>(0.108, 0.118)                       | 0.222<br>(0.212, 0.232)                           | 0.991<br>(0.991, 0.991)                           | 0.076<br>(0.072, 0.079)                   |
| LR                                                                                                    | 0.851<br>(0.846, 0.856) | 3.2x10 <sup>-3</sup><br>(3.2x10 <sup>-3</sup> , 3.3x10 <sup>-3</sup> ) | 0.113<br>(0.108, 0.118)                       | 0.227<br>(0.217, 0.237)                           | 0.991<br>(0.990, 0.991)                           | 0.075<br>(0.071, 0.079)                   |
| RF                                                                                                    | 0.849<br>(0.845, 0.854) | 3.2x10 <sup>-3</sup><br>(3.2x10 <sup>-3</sup> , 3.3x10 <sup>-3</sup> ) | 0.103<br>(0.099, 0.108)                       | 0.217<br>(0.208, 0.227)                           | 0.990<br>(0.990, 0.990)                           | 0.068<br>(0.065, 0.071)                   |
| ANN                                                                                                   | 0.852<br>(0.847, 0.857) | 3.2x10 <sup>-3</sup><br>(3.2x10 <sup>-3</sup> , 3.3x10 <sup>-3</sup> ) | 0.118<br>(0.113, 0.124)                       | 0.233<br>(0.223, 0.243)                           | 0.991<br>(0.991, 0.991)                           | 0.079<br>(0.076, 0.083)                   |
| Ensemble: LR/RF                                                                                       | 0.856<br>(0.851, 0.861) | 3.2x10 <sup>-3</sup><br>(3.1x10 <sup>-3</sup> , 3.3x10 <sup>-3</sup> ) | 0.115<br>(0.110, 0.120)                       | 0.236<br>(0.226, 0.246)                           | 0.990<br>(0.990, 0.991)                           | 0.076<br>(0.072, 0.080)                   |
| Ensemble: RF/ANN                                                                                      | 0.856<br>(0.851, 0.861) | 3.2x10 <sup>-3</sup><br>(3.2x10 <sup>-3</sup> , 3.3x10 <sup>-3</sup> ) | 0.116<br>(0.111, 0.121)                       | 0.237<br>(0.227, 0.247)                           | 0.990<br>(0.990, 0.991)                           | 0.077<br>(0.073, 0.080)                   |
| Ensemble: LR/ANN                                                                                      | 0.853<br>(0.848, 0.858) | 3.2x10 <sup>-3</sup><br>(3.2x10 <sup>-3</sup> , 3.3x10 <sup>-3</sup> ) | 0.117<br>(0.111, 0.122)                       | 0.232<br>(0.223, 0.243)                           | 0.991<br>(0.991, 0.991)                           | 0.078<br>(0.074, 0.082)                   |
| Ensemble: LR/RF/ANN                                                                                   | 0.857<br>(0.852, 0.862) | 3.2x10 <sup>-3</sup><br>(3.1x10 <sup>-3</sup> , 3.3x10 <sup>-3</sup> ) | 0.117<br>(0.112, 0.123)                       | 0.237<br>(0.227, 0.247)                           | 0.991<br>(0.991, 0.991)                           | 0.078<br>(0.074, 0.082)                   |
| Male (N visits (events) training: 2,740,517 (9,651); N visits (events) testing: 1,170,320 (3,961))    |                         |                                                                        |                                               |                                                   |                                                   |                                           |
| OP                                                                                                    | 0.819<br>(0.811, 0.826) | 3.3x10 <sup>-3</sup><br>(3.2x10 <sup>-3</sup> , 3.4x10 <sup>-3</sup> ) | 0.093<br>(0.087, 0.099)                       | 0.200<br>(0.188, 0.213)                           | 0.989<br>(0.989, 0.990)                           | 0.061<br>(0.057, 0.065)                   |
| LR                                                                                                    | 0.818<br>(0.811, 0.825) | 3.3x10 <sup>-3</sup><br>(3.2x10 <sup>-3</sup> , 3.4x10 <sup>-3</sup> ) | 0.089<br>(0.083, 0.095)                       | 0.185<br>(0.173, 0.198)                           | 0.990<br>(0.990, 0.990)                           | 0.058<br>(0.054, 0.063)                   |
| RF                                                                                                    | 0.824<br>(0.816, 0.831) | 3.3x10 <sup>-3</sup><br>(3.2x10 <sup>-3</sup> , 3.4x10 <sup>-3</sup> ) | 0.092<br>(0.086, 0.098)                       | 0.199<br>(0.187, 0.211)                           | 0.989<br>(0.989, 0.990)                           | 0.060<br>(0.056, 0.064)                   |
| ANN                                                                                                   | 0.819<br>(0.812, 0.827) | 3.3x10 <sup>-3</sup><br>(3.2x10 <sup>-3</sup> , 3.4x10 <sup>-3</sup> ) | 0.096<br>(0.090, 0.102)                       | 0.206<br>(0.193, 0.218)                           | 0.990<br>(0.989, 0.990)                           | 0.063<br>(0.059, 0.067)                   |
| Ensemble: LR/RF                                                                                       | 0.829<br>(0.822, 0.836) | 3.3x10 <sup>-3</sup><br>(3.2x10 <sup>-3</sup> , 3.4x10 <sup>-3</sup> ) | 0.093<br>(0.087, 0.099)                       | 0.197<br>(0.185, 0.210)                           | 0.990<br>(0.989, 0.990)                           | 0.060<br>(0.056, 0.065)                   |
| Ensemble: RF/ANN                                                                                      | 0.828<br>(0.820, 0.835) | 3.3x10 <sup>-3</sup><br>(3.2x10 <sup>-3</sup> , 3.4x10 <sup>-3</sup> ) | 0.101<br>(0.095, 0.107)                       | 0.220<br>(0.207, 0.233)                           | 0.989<br>(0.989, 0.990)                           | 0.065<br>(0.061, 0.070)                   |
| Ensemble: LR/ANN                                                                                      | 0.821<br>(0.814, 0.829) | 3.3x10 <sup>-3</sup><br>(3.2x10 <sup>-3</sup> , 3.4x10 <sup>-3</sup> ) | 0.093<br>(0.088, 0.099)                       | 0.201<br>(0.189, 0.214)                           | 0.989<br>(0.989, 0.990)                           | 0.061<br>(0.057, 0.065)                   |
| Ensemble: LR/RF/ANN                                                                                   | 0.829<br>(0.821, 0.836) | 3.3x10 <sup>-3</sup><br>(3.2x10 <sup>-3</sup> , 3.4x10 <sup>-3</sup> ) | 0.095<br>(0.089, 0.101)                       | 0.204<br>(0.191, 0.216)                           | 0.990<br>(0.989, 0.990)                           | 0.062<br>(0.058, 0.066)                   |
